# Supplementary material for: Evaluation of the Choosing Wisely Australia 5 Questions resource and a shared decision-making preparation video: protocol for an online experiment
Source: PubMed Central journal article supplement — BMJ Open. 2019 Nov 14;9(11):e033126. doi: 10.1136/bmjopen-2019-033126 (PMC6886943; doi:10.1136/bmjopen-2019-033126), 2019-11-14
Supplement: bmjopen-2019-033126.draft_revisions.pdf [file bmjopen-2019-033126.draft_revisions.pdf]

# BMJ Open

BMJ Open is committed to open peer review. As part of this commitment we make the peer review history of every article we publish publicly available.

When an article is published we post the peer reviewers' comments and the authors' responses online. We also post the versions of the paper that were used during peer review. These are the versions that the peer review comments apply to.

The versions of the paper that follow are the versions that were submitted during the peer review process. They are not the versions of record or the final published versions. They should not be cited or distributed as the published version of this manuscript.

BMJ Open is an open access journal and the full, final, typeset and author-corrected version of record of the manuscript is available on our site with no access controls, subscription charges or pay-per-view fees (<http://bmjopen.bmj.com>).

If you have any questions on BMJ Open's open peer review process please email [info.bmjopen@bmj.com](mailto:info.bmjopen@bmj.com)

# BMJ Open

**Effectiveness of the Choosing Wisely Australia® 5 Questions resource to support patient question-asking and participation in shared decision-making (EQUIP-SDM): Protocol for a randomised controlled trial**

|                               |                                                                                                                                                                                                                                                                                                                                                                                                                                                                                                                                                                                         |
|-------------------------------|-----------------------------------------------------------------------------------------------------------------------------------------------------------------------------------------------------------------------------------------------------------------------------------------------------------------------------------------------------------------------------------------------------------------------------------------------------------------------------------------------------------------------------------------------------------------------------------------|
| Journal:                      | <i>BMJ Open</i>                                                                                                                                                                                                                                                                                                                                                                                                                                                                                                                                                                         |
| Manuscript ID                 | bmjopen-2019-033126                                                                                                                                                                                                                                                                                                                                                                                                                                                                                                                                                                     |
| Article Type:                 | Protocol                                                                                                                                                                                                                                                                                                                                                                                                                                                                                                                                                                                |
| Date Submitted by the Author: | 22-Jul-2019                                                                                                                                                                                                                                                                                                                                                                                                                                                                                                                                                                             |
| Complete List of Authors:     | Muscat, Danielle; The University of Sydney, Faculty of Medicine and Health<br>Chang, Edward ; The University of Sydney<br>Thompson, Rachel ; The University of Sydney<br>Cvejic, Erin; The University of Sydney<br>Tracy, Marguerite ; The University of Sydney<br>Zadro, Joshua; University of Sydney, Institute for Musculoskeletal Health, School of Public Health<br>Smith, Jessica ; The University of Sydney<br>Lindner, Robyn ; NPS Medicinewise<br>McCaffery, Kirsten; The University of Sydney, Sydney Health Literacy Lab, School of Public Health; The University of Sydney, |
| Keywords:                     | patient participation, decision making, shared decision making, health literacy, question prompt list, medical overuse                                                                                                                                                                                                                                                                                                                                                                                                                                                                  |
|                               |                                                                                                                                                                                                                                                                                                                                                                                                                                                                                                                                                                                         |

SCHOLARONE™  
Manuscripts

1  
2  
3 **Effectiveness of the Choosing Wisely Australia® 5 Questions resource to support**  
4  
5  
6 **patient question-asking and participation in shared decision-making (EQUiP-**  
7  
8 **SDM): Protocol for a randomised controlled trial**  
9  
10

11  
12  
13  
14 Danielle Marie Muscat<sup>1,2</sup>, Edward Hoi-fan Chang<sup>1</sup>, Rachel Thompson<sup>1,2</sup>, Erin Cvejic<sup>1</sup>,  
15 Marguerite Tracy<sup>3</sup>, Joshua Zadro<sup>4</sup>, Jessica Kathleen Smith<sup>1</sup>, Robyn Lindner<sup>5</sup>, Kirsten  
16 McCaffery<sup>1,2</sup>  
17  
18

19  
20  
21 <sup>1</sup> University of Sydney, Faculty of Medicine and Health, School of Public Health,  
22 Sydney Health Literacy Lab, New South Wales, Australia  
23  
24

25  
26  
27 <sup>2</sup> University of Sydney, Faculty of Medicine and Health, School of Public Health,  
28 Wisser Healthcare, New South Wales, Australia  
29  
30

31  
32  
33 <sup>3</sup> University of Sydney, Faculty of Medicine and Health, School of Public Health,  
34 New South Wales, Australia  
35  
36

37  
38  
39 <sup>4</sup> University of Sydney, Faculty of Medicine and Health, School of Public Health,  
40 Institute for Musculoskeletal Health, New South Wales, Australia  
41  
42

43  
44  
45 <sup>5</sup> NPS Medicinewise, New South Wales, Australia  
46  
47

48  
49  
50  
51 Corresponding author: 127A Edward Ford Building, University of Sydney, 2006,  
52 NSW, Australia. [danielle.muscat@sydney.edu.au](mailto:danielle.muscat@sydney.edu.au)  
53  
54

55  
56  
57 Keywords: patient participation, decision making, shared decision making, health  
58 literacy, question prompt list, medical overuse  
59  
60

1  
2  
3  
4  
5  
6  
7  
8  
9  
10  
11  
12  
13  
14  
15  
16  
17  
18  
19  
20  
21  
22  
23  
24  
25  
26  
27  
28  
29  
30  
31  
32  
33  
34  
35  
36  
37  
38  
39  
40  
41  
42  
43  
44  
45  
46  
47  
48  
49  
50  
51  
52  
53  
54  
55  
56  
57  
58  
59  
60

For peer review only

## Abstract

**Introduction:** Choosing Wisely, an international effort to reduce low value care worldwide, encourages patients to ask their doctors questions to support evidence-based shared decision-making. In Australia, Choosing Wisely has developed a 5 Questions resource to help reduce low value care.

**Aims:** The primary aim of this study is to evaluate the effectiveness of the Choosing Wisely Australia 5 Questions resource and a video designed to prepare patients for question-asking and participation in shared decision-making on a) self-efficacy to ask questions and participate in shared decision-making, b) intention to participate in shared decision-making and c) a range of secondary outcomes. The secondary aim of this study is to determine whether health literacy modifies the effects of the interventions.

**Methods:** We will use 2x2x2 between-subjects factorial design (preparation video: yes, no x Choosing Wisely 5 questions resource: yes, no x health literacy: adequate, inadequate). Participants will be recruited by an online market research company, presented with a hypothetical non-specific low back pain scenario, and randomised to study groups stratified by health literacy.

1  
2  
3 **Analysis:** Quantitative primary and secondary outcome data will be analysed as  
4  
5  
6 intention-to-treat using appropriate regression models (i.e., linear regression for  
7  
8  
9 continuous outcomes, logistic regression for dichotomous categorical outcomes).  
10

11  
12  
13  
14 **Ethics and dissemination:** Ethical approval for this study was obtained from the  
15  
16  
17 University of Sydney Human Research Ethics Committee (protocol number:  
18  
19 2018/965). The results from this work will be disseminated through peer-reviewed  
20  
21  
22 international journals, conferences and updates with collaborating public health  
23  
24  
25 bodies. Resources developed for this study will be made available to patients and  
26  
27  
28 clinicians following trial completion.  
29

30  
31 **Study registration:** This trial has been registered with the Australia New Zealand  
32  
33  
34 Clinical Trials Registry (trial number: 376477).  
35  
36  
37  
38  
39  
40  
41  
42  
43  
44  
45  
46  
47  
48  
49  
50  
51  
52  
53  
54  
55  
56  
57  
58  
59  
60

### Strengths and limitations of this study

- This is the first study to assess the relative effectiveness of the Choosing Wisely Australia 5 Questions resource, both alone and in combination with an additional video intervention designed to support and build patients' confidence to ask questions compared to no intervention, and explore whether health literacy impacts intervention effectiveness.
- We will randomly allocate participants, conceal allocation, blind study statisticians and aim to recruit 1432 participants to achieve at least 80% power.
- The main limitation of this study is reduced ecological validity and the limited generalisability of the findings due to a) online recruitment and use of 'healthy volunteers', b) the use of a hypothetical scenario, and c) delivering the interventions in a way that diverges from how they would be/are delivered in the real world.
- However, this design allows us to achieve a high response and follow-up rate with adequate representation of people with limited health literacy in a factorial design requiring a large sample.

1  
2  
3 **Effectiveness of the Choosing Wisely Australia® 5 Questions resource to support**  
4  
5  
6 **patient question-asking and participation in shared decision-making (EQUiP-**  
7  
8 **SDM): Protocol for a randomised controlled trial**  
9  
10

11  
12  
13  
14 Unnecessary and potentially harmful services account for a significant  
15  
16 proportion of total health expenditure.[1] The need to eliminate unnecessary medical  
17  
18 care, decrease waste and reduce overdiagnosis has received increasing attention  
19  
20 from health systems in the past decade. One initiative that has gained momentum  
21  
22 worldwide is Choosing Wisely®.[2] Launched in April 2012 by the American Board  
23  
24 of Internal Medicine (ABIM) Foundation, the Choosing Wisely campaign has now  
25  
26 been adapted and implemented in more than 20 countries worldwide. The campaign  
27  
28 seeks to encourage clinicians and patients to talk about medical tests and procedures  
29  
30 that may be unnecessary, and in some instances, can cause harm.[2] While  
31  
32 acknowledging that it is often challenging to have conversations about unnecessary  
33  
34 tests and treatments, leaders of the campaign consider communication between  
35  
36 clinicians and patients during routine clinical encounters a key mechanism for  
37  
38 change.[2]  
39  
40  
41  
42  
43  
44  
45  
46  
47  
48  
49  
50

51  
52 As part of the original Choosing Wisely campaign, Consumer Reports  
53  
54 developed five questions for patients to ask healthcare providers to support better  
55  
56 conversations about unnecessary tests, medications and procedures.[3] The  
57  
58 questions are publically available and have been promoted for use nationally and  
59  
60



1  
2  
3 internationally. The five questions were adapted slightly by Choosing Wisely  
4  
5  
6 Australia® (see Box 1) and have been disseminated in several forms and languages,  
7  
8 including as a one-page downloadable resource, '5 Questions to Ask Your Doctor'  
9  
10  
11 (hereafter referred to as the 5 Questions resource), that lists the questions and  
12  
13  
14 provides additional guidance in their rationale and use (see Appendix A). Annual  
15  
16  
17 evaluation surveys conducted by Choosing Wisely Australia suggested that, in 2015  
18  
19  
20 and 2016, 8% of health care consumers were aware of the 5 Questions resource and,  
21  
22  
23 in 2017, it was the organisation's most commonly downloaded material (4).  
24  
25  
26  
27  
28

### Box 1. The Choosing Wisely Australia® 5 questions

- 31 1. Do I really need this test, treatment or procedure?
- 32
- 33 2. What are the risks?
- 34
- 35
- 36 3. Are there simpler, safer options?
- 37
- 38
- 39 4. What happens if I don't do anything?
- 40
- 41
- 42 5. What are the costs?
- 43
- 44

45 © National Prescribing Service Ltd. Reproduced with permission. Visit [www.choosingwisely.org.au](http://www.choosingwisely.org.au)

46  
47  
48  
49  
50 The 5 Questions resource has been promoted for its "potential to facilitate  
51  
52  
53 better conversations between healthcare providers and consumers".[4] However, it  
54  
55  
56 has yet to be formally evaluated, and the precise expected mechanism of action for  
57  
58  
59 its effect on the use of low value care has not been investigated. Notwithstanding,  
60

1  
2  
3 question prompt lists of this kind are typically regarded as a strategy for facilitating  
4  
5 shared decision-making [5] and thus, improved shared decision-making is an  
6  
7 obvious potential mediator of the hypothesised effect of the 5 Questions resource on  
8  
9 the use of care (see Figure 1).  
10  
11  
12  
13  
14  
15  
16

17 --- Figure 1 ---  
18  
19  
20  
21

22 Despite its potential, focus testing by Choosing Wisely Australia suggested  
23 that the 5 Questions resource alone may not be sufficient for enabling patient  
24 question-asking.[4] In response to this, Choosing Wisely Australia has developed  
25 accompanying resources (e.g., posters featuring local hospital staff,[4] a video  
26 illustrating how to have conversations with health professionals [6]) that address  
27 some potential barriers to the impact of the 5 Questions resource (e.g., the social  
28 unacceptability of active participation, patient concerns about healthcare providers'  
29 reactions and possible retribution). However, other elements proposed as critical for  
30 preparing patients in advance of exposure to a shared decision-making intervention  
31 (e.g., explaining that there are two experts in the encounter (healthcare provider *and*  
32 patient), challenging attitudes that there are universally right and wrong  
33 decisions)[7, 8] remain unaddressed by these resources. An intervention that  
34 addresses all elements considered critical for patient preparation may enhance the  
35 effectiveness of the 5 Questions resource and may also, on its own, be beneficial.  
36  
37  
38  
39  
40  
41  
42  
43  
44  
45  
46  
47  
48  
49  
50  
51  
52  
53  
54  
55  
56  
57  
58  
59  
60

1  
2  
3 The effectiveness of the 5 Questions resource may also depend on patients'  
4 health literacy;[9] that is, "the cognitive and social skills which determine the  
5  
6 motivation and ability of individuals to gain access to, understand and use  
7  
8 information in ways which promote and maintain good health"[10]. Adults with  
9  
10 lower health literacy have worse health outcomes (e.g. increased hospital admissions  
11  
12 and readmissions;[11] poorer chronic disease outcomes [12] and increased mortality  
13  
14 [13]), and importantly ask fewer questions when seeing healthcare providers.[14]  
15  
16 Previous research shows that interventions that are tailored to an individuals' health  
17  
18 literacy level can support more effective communication and potentially reduce  
19  
20 health inequalities for people with lower health literacy.[15-17] However,  
21  
22 intervention developers often fail to tailor the design of their interventions to adults  
23  
24 with lower health literacy and rarely evaluate their impact in this group.  
25  
26  
27  
28  
29  
30  
31  
32  
33  
34  
35  
36  
37

### 38 *Objectives*

39  
40  
41 The primary aim of this study is to evaluate the effectiveness of the Choosing  
42  
43 Wisely Australia 5 Questions resource and a newly-developed video designed to  
44  
45 prepare patients for question-asking and build their confidence to participate in  
46  
47 shared decision-making on a) self-efficacy to ask questions and participate in shared  
48  
49 decision-making, b) intention to participate in shared decision-making and c) a  
50  
51 range of secondary outcomes. The secondary aim of this study is to determine  
52  
53 whether health literacy modifies the effects of the interventions.  
54  
55  
56  
57  
58  
59  
60

## Methods

### *Study design and setting*

We will use 2x2x2 between-subjects factorial design (preparation video: yes, no x Choosing Wisely 5 questions resource: yes, no x health literacy: adequate, inadequate). This design will enable us to assess the relative effectiveness of different interventions, both alone and in combination compared to no intervention. This design will also allow us to explore whether health literacy impacts the effectiveness of these interventions.

This study will be conducted online using the Qualtrics survey platform. Randomisation will be undertaken via an automated function in the survey platform using an equal allocation ratio and stratification by participant health literacy (adequate, inadequate), yielding four trial arms in each health literacy subgroup: (1) preparation video alone, (2) 5 Questions resource alone, (3) preparation video and 5 Questions resource, and (4) no intervention. Participants will not be blinded to their assigned intervention.

### *Participants, recruitment, and consent*

To be eligible to take part, potential participants must be aged 18 years or older; be an Australian citizen or permanent resident; and possess sufficient self-assessed English language skills to complete questionnaires in English.

Participants will be identified, pre-screened for eligibility, and invited to consider participation by Dynata, a market research company with a database of

1  
2  
3 600,000 people willing to be involved in online research. Dynata uses a points  
4  
5 system whereby points are earned for completion of surveys which can be redeemed  
6  
7 for items such as gift vouchers, donations to charities or cash. If participants agree  
8  
9 and are interested in being part of the study, they will be directed to an online  
10  
11 survey hosted in Qualtrics. The first page of the survey will display the  
12  
13 downloadable Participant Information Statement (see Appendix B). In line with the  
14  
15 Australian National Statement on Ethical Conduct in Human Research, 2007  
16  
17 (updated 2018), we have received ethical approval to regard completion of the  
18  
19 questionnaire as an indication of consent. Participants are also required to select  
20  
21 'Yes, I would like to participate' to enter the survey.  
22  
23  
24  
25  
26  
27  
28  
29  
30  
31  
32

33 During the study, all participants will be presented with a hypothetical  
34  
35 healthcare scenario that asks them to imagine being in a situation where they have  
36  
37 non-specific low back pain and stable pain/symptoms (See Box 2). Non-specific low  
38  
39 back pain describes pain between the inferior border of the twelfth rib and lower  
40  
41 gluteal folds that is not caused by a serious or specific underlying pathology.[18]  
42  
43 Back pain was the eighth most frequently managed problem Australian general  
44  
45 practice in 2015 [19] and non-specific low back pain accounts for approximately 90%  
46  
47 of low back pain cases.[20] Routine imaging for non-specific low back pain has been  
48  
49 shown to have more harms than benefits, and furthermore many medical treatments  
50  
51 provide little-to-no benefit over placebo.[21, 22]  
52  
53  
54  
55  
56  
57  
58  
59  
60

## Box 2. Hypothetical back pain scenario

“You have had lower back pain for about one month; it has not improved or become worse. You did not have an accident to cause the pain; it just began and has not gone away.

You go to your doctor to get advice on what is causing it and what can help with the pain.

The doctor recommends that you have a scan to help figure out what is causing the pain, and gives you a prescription for some medicine.”

### *Interventions*

#### *Preparation video<sup>1</sup>*

We developed a short video (3 minutes) intended to prepare patients for question-asking and shared decision-making. Our rationale for this choice of intervention included that multimedia formats can be a successful tool in engaging and educating patients with low health literacy and encouraging or modifying patient behaviour [23-25] and that videos featuring real people have been found to be more effective than those which only provide graphically presented information

---

<sup>1</sup> In communications with participants, this intervention was referred to as the ‘Introduction to shared decision making’ video

1  
2  
3 with voice overs.[23] The video script (Appendix C) was developed through an  
4  
5  
6 iterative process and was intended to integrate the recommendations for effective  
7  
8  
9 preparation as outlined by Joseph-Williams and colleagues.[8] The transcript was  
10  
11 developed with reference to the Listenability Style Guide which outlines principles  
12  
13  
14 to make spoken discourse more comprehensible and ease the cognitive burden of  
15  
16  
17 listening (e.g. repetition of ideas; simple and common idioms; vivid analogies; use of  
18  
19  
20 questions to focus the listener's attention).[26] The readability level of the script was  
21  
22  
23 also checked and adjusted until a grade five readability level was achieved.  
24  
25  
26

### *Choosing Wisely Australia 5 Questions resource<sup>2</sup>*

27  
28  
29  
30 The Choosing Wisely Australia 5 Questions resource is a one-page document  
31  
32  
33 co-branded by Choosing Wisely Australia and NPS Medicinewise that lists the  
34  
35  
36 Choosing Wisely Australia 5 questions (see Box 1 above) and provides additional  
37  
38  
39 guidance in their rationale and use (see Appendix A). This resource has a  
40  
41  
42 readability score of 9.4.  
43  
44  
45

### *Implementation of interventions*

46  
47  
48  
49 The interventions will be displayed to participants within the survey  
50  
51  
52 platform. To ensure intervention exposure, a timer has been added to the pages  
53  
54  
55 displaying the video (3 minutes) and 5 Questions resource (1 minute), preventing  
56  
57  
58

---

59  
60 <sup>2</sup> In communications with participants, this intervention was referred to as the Choosing Wisely Questions

1  
2  
3 participants from progressing to the next survey page until the specified time has  
4  
5 elapsed. In the preparation video and 5 Questions resource arm, the video will be  
6  
7 presented before the 5 Questions resource. Participants will not be prevented from  
8  
9 exposure to any other care or interventions prior to or during the study.  
10  
11  
12  
13  
14  
15  
16

### 17 *Data Collection*

18  
19 Study data will be collected via surveys administered immediately before  
20  
21 ('Pre'), immediately after ('Post'), and two weeks after ('Follow-up') exposure to the  
22  
23 relevant intervention(s) (see Figure 2). All outcomes will be assessed by participant  
24  
25 self-report with the exception of proactive intervention use, which will be assessed  
26  
27 using observational methods (see Outcomes and Measures).  
28  
29  
30  
31  
32  
33  
34  
35  
36  
37  
38  
39  
40  
41  
42  
43  
44  
45  
46  
47  
48  
49  
50  
51  
52  
53  
54  
55  
56  
57  
58  
59  
60

--- Figure 2 ---



### *Outcomes and Measures*

Primary and secondary outcomes for the study, as well as measurement instruments and analysis metrics, are shown in Table 1. Outcomes and measures were refined following a pilot study (n=164). Unpublished pilot data are available from the authors upon request.

For peer review only

Table 1.  
*Outcomes and measurement*

|         | <b>Outcome</b>                                                               | <b>Measure</b>                                                                                                                                                                                                                                                    | <b>Pre</b> | <b>Post</b> | <b>Follow-up</b> |
|---------|------------------------------------------------------------------------------|-------------------------------------------------------------------------------------------------------------------------------------------------------------------------------------------------------------------------------------------------------------------|------------|-------------|------------------|
| Primary | Self-efficacy to ask questions                                               | Single item adapted from Bandura's self-efficacy theory.[27] Participants are asked to rate their degree of confidence to ask questions of their healthcare provider by recording a number from 0 (Cannot do at all) to 100 (Highly certain can do).              | x          | x           | x                |
|         | Self-efficacy to be involved in healthcare decision-making                   | Single item adapted from Bandura's self-efficacy theory.[27] Participants are asked to rate their degree of confidence to be involved in decisions with their healthcare provider by recording a number from 0 (Cannot do at all) to 100 (Highly certain can do). | x          | x           | x                |
|         | Self-efficacy to ask questions and be involved in healthcare decision-making | Composite measure based on two individual items (see above).                                                                                                                                                                                                      | x          | x           | x                |
|         | Intention to engage in shared decision-making                                | Validated, three-item scale (Cronbach alpha = 0.8; [28]) measuring participants' (i) likelihood of engaging in shared decision-making, from very unlikely (-3) to very likely (+3), (ii) odds of engaging in shared decision-making, from very                    | x          | x           | x                |

|           |                                                                                              |                                                                                                                                                                                                                                                                                                                                                                                                                                                                        |   |   |   |
|-----------|----------------------------------------------------------------------------------------------|------------------------------------------------------------------------------------------------------------------------------------------------------------------------------------------------------------------------------------------------------------------------------------------------------------------------------------------------------------------------------------------------------------------------------------------------------------------------|---|---|---|
|           |                                                                                              | weak (-3) to very strong (+3) and (iii) agreement with the statement 'I intend to engage in shared decision-making', from total disagreement (-3) to total agreement (+3). Total scores will be rescaled on a scale of 0-6 and the sum of the items divided by three to derive the total score of intention.                                                                                                                                                           |   |   |   |
| Secondary | Intention to follow the treatment plan recommended by the doctor without further questioning | A single item on a 10-point scale, adapted from previous research,[29] assessing hypothetical intention to follow the treatment plan recommended by the doctor without further questioning: 'Which best describes your intention to follow the treatment plan recommended by the doctor without asking further questions?' (1 = 'Definitely will not' to 10 = 'Definitely will').                                                                                      | x | x | x |
| y         | Knowledge of patient's rights in regards to shared decision-making                           | Four questions adapted from Halaway et al [30] and applied to the Australian Charter of Healthcare Rights.[31] Participants were asked to indicate "Yes", "No" or "Unsure" to show whether they think the following are patient rights: a) right to talk about questions, concerns and costs regarding diagnosis and treatment; b) right to be given information about your condition and treatment options in word you understand; c) right to be included in choices | x | x |   |

1  
2  
3  
4  
5  
6  
7  
8  
9  
10  
11  
12  
13  
14  
15  
16  
17  
18  
19  
20  
21  
22  
23  
24  
25  
26  
27  
28  
29  
30  
31  
32  
33  
34  
35  
36  
37  
38  
39  
40  
41  
42  
43  
44  
45  
46

about your care. A foil question will be included to detect if participants are arbitrarily selecting 'yes' to all questions. Scores are dichotomised into a) all questions correct, or b) not all questions correct.

Attitude toward shared decision-making

3-item scale adapted from Dormandy et al.,[32] assessing participants' perceptions of shared decision-making as beneficial/not beneficial, worthwhile/not worthwhile and important/unimportant. Each item has seven response options, forming a scale from 3 to 21. Higher scores indicate less positive attitudes towards shared decision-making. Participants responding with the highest possible score on all three questions will be classified as having positive attitudes.

x

Preparedness for shared decision-making

Modified, 8-item version of the Preparation for Decision Making Scale (PrepDM).[33] The PrepDM scale was developed to assess a patient's perception of how useful a decision support intervention is in preparing the respondent to communicate with their practitioner at a consultation visit and to make a health decision. Items are scored on a likert scale 1-5, from 'Not at all' (1) to 'A great deal' (5), with higher scores indicating higher

x

1  
2  
3  
4  
5  
6  
7  
8  
9  
10  
11  
12  
13  
14  
15  
16  
17  
18  
19  
20  
21  
22  
23  
24  
25  
26  
27  
28  
29  
30  
31  
32  
33  
34  
35  
36  
37  
38  
39  
40  
41  
42  
43  
44  
45  
46

perceived level of preparation for decision-making. Items will be summed and the total score divided by 8.[33]

Acceptability (*Arms 1-3 only*)

Adapted from Shepherd et al,[34] participants asked to rate if they would a) recommend the [intervention] to others and b) use the [intervention] again on a four-point scale from 1 (Definitely not) to 4 (Yes, definitely).[34] Recommendations are dichotomised into would recommend (3 and 4) and would not recommend (1 and 2).

x

Proactive Intervention Use (*Arms 1-3 only*)

We will assess the proportion of participants who click on a link to their intervention.

x

x

Healthcare questions

Participants will be asked to write down 5 questions that they would ask the doctor given the hypothetical healthcare scenario. The content of individual responses will be analysed via content analysis using inductive and deductive approaches (see below). The mean number of questions that map onto the Choosing Wisely 5 Questions will be calculated.

x

x

### *Demographic and health data collection*

In addition to the primary and secondary outcomes, participants will be asked to report their age, gender, Australian state of residence, language spoken at home, education status, employment status, private health insurance status and confidence in filling out medical forms (35). Participants will also be asked to indicate who is usually involved in healthcare decision-making related to their health, and about their experience and perceived knowledge of low back pain. Health literacy will be assessed by the Newest Vital Sign (NVS),[36] with participants categorised as inadequate (score 0-3 on NVS) or adequate literacy (score 4-6 on NVS). We will also administer a single-item measure of self-reported health literacy for the purposes of describing the sample.

## **Analysis**

### *Quantitative data analysis*

The study statistician will be blinded to the intervention allocation of participants and their level of health literacy until after completion of analyses; a research assistant who has no other involvement in the trial will remove all group identifiers prior to analysis. Quantitative primary and secondary outcome data will be analysed as intention-to-treat using appropriate regression models (i.e., linear regression for continuous outcomes, logistic regression for dichotomous categorical outcomes). Dichotomous variables representing the study factors (preparation video:

1  
2  
3 provided, not provided; Choosing Wisely Australia 5 questions resource: provided,  
4  
5  
6 not provided; health literacy: adequate, inadequate) and their interactions will be  
7  
8 included in models as between-subjects fixed effects, controlling for pre-intervention  
9  
10 values (where available). Outcome data collected during the immediate post- and  
11  
12 follow-up survey will be analysed in separate models.  
13  
14  
15  
16  
17

### 18 *Missing data*

19  
20 The use of an online survey platform minimises the risk of missing data;  
21  
22 participants are required to provide responses to each question before moving on  
23  
24 to subsequent items. As such, data is only missing in cases where participants  
25  
26 discontinue prior to providing responses for outcome measures. Participants who  
27  
28 discontinue the study before completion of the (immediate) post-intervention survey  
29  
30 will be excluded from all analyses. Multiple imputation will be used [37] to impute  
31  
32 occasional cases of missing data (e.g. some outcome measures incomplete) or for  
33  
34 missing responses for participants who complete the initial (pre- and post-) surveys,  
35  
36 but do not return to complete the 2-week follow-up survey. If multiple imputation of  
37  
38 missing data is utilised, sensitivity analyses will be performed comparing the  
39  
40 outcome from complete-case with imputed analyses.  
41  
42  
43  
44  
45  
46  
47  
48  
49  
50  
51  
52

### 53 *Sample size*

54  
55 Sample size estimates were derived based on the primary outcome of intention score,  
56  
57 with the estimates of effect based on previously published values [28] and refined  
58  
59  
60

1  
2  
3 considering pilot data. For each stratified analysis arm (i.e., inadequate health  
4 literacy, adequate health literacy), a sample of n=162 subjects per intervention group  
5  
6 is expected to provide approximately 80% power to detect a small main effect (effect  
7  
8 size of 0.10 or greater) of the Choosing Wisely Australia questions resource; and over  
9  
10 80% power to detect small main effects (effect sizes 0.20 or larger) of the preparation  
11  
12 video intervention, and their interaction, at a p-value of 0.05 in primary analyses. As  
13  
14 such, we aim to recruit a total sample size of N=1432 (i.e., 716 with inadequate health  
15  
16 literacy and 716 with adequate health literacy; with n = 179 participants randomly  
17  
18 allocated to each intervention group [preparation video alone, Choosing Wisely  
19  
20 Australia 5 questions resource alone, both Choosing Wisely questions and  
21  
22 preparation intervention, and control]). This will allow for a drop-out of  
23  
24 approximately 10% of participants who discontinue the study before completing the  
25  
26 (immediate) post-intervention survey measures.  
27  
28  
29  
30  
31  
32  
33  
34  
35  
36  
37  
38  
39  
40

### 41 *Qualitative data analysis*

42  
43 Assessment of healthcare questions deemed by participants as important to  
44  
45 ask in their hypothetical scenario will be analysed via content analysis.[38] Coding  
46  
47 will first be done deductively based on concepts embodied in the Choosing Wisely  
48  
49 Australia 5 Questions resource.[39] Two double-blind coders will review all data  
50  
51 and code any questions that fit broadly into 1 of 5 categories: Do I really need this  
52  
53 test, treatment or procedure? What are the risks? Are there simpler, safer options?  
54  
55 What happens if I don't do anything? What are the costs?[40, 41] Any discrepancies  
56  
57  
58  
59  
60



1  
2  
3 will be resolved through discussion between coders. Remaining responses will be  
4  
5  
6 coded inductively with categories derived from the data.[40] Inductive codes will be  
7  
8  
9 collected to form coding sheets and categories freely generated and grouped through  
10  
11 the abstraction process.[40] The coding scheme will revised over an iterative process  
12  
13  
14 of discussion and revision to ensure all themes are captured.  
15  
16  
17  
18  
19

## 20 **Ethics and dissemination**

### 21 22 *Ethical approval and trial registration*

23  
24  
25 Ethical approval for this study was obtained from the University of Sydney  
26  
27  
28 Human Research Ethics Committee (protocol number: 2018/965). This trial has been  
29  
30  
31 registered with the Australia New Zealand Clinical Trials Registry (trial number:  
32  
33  
34 376477).  
35  
36  
37  
38

### 39 *Data storage and management*

40  
41 After enrolment, a unique identifier will be assigned to each study  
42  
43  
44 participant. Any participant identifiers will be removed before the data are archived for  
45  
46  
47 storage. Data will be downloaded as spreadsheets and stored on password protected  
48  
49  
50 computers which are encrypted per university policy. Listed investigators will have  
51  
52  
53 access to the final study dataset.  
54  
55  
56  
57  
58  
59  
60

### *Dissemination and data sharing*

To enhance reporting transparency, this study will be reported in accordance with the Consolidated Standards of Reporting Trials Statement and Checklist. The results from this work will be published as a full-length, peer-reviewed manuscript and presented at national and international meetings. The results from this work will also be disseminated through collaborating public health bodies. Any protocol modification will be communicated during dissemination activities. Resources developed for this study will be made available to patients and clinicians following trial completion.

### *Patient involvement*

We performed a pilot study of the intervention (n=164), and included a further qualitative interview study with a sub-set of health consumers (n=25) to refine our interventions and outcome measures. A consumer has been involved in the study design, selecting outcomes and developing the intervention, and will continue to inform the analysis and dissemination of findings.

## References

- 1 Berwick DM, Hackbarth AD. Eliminating waste in US health care. *JAMA* 2012;307(14):1513-6.
- 2 Levinson W, Kallewaard M, Bhatia RS, Wolfson D, Shortt S, Kerr EA. Choosing Wisely' a growing international campaign. *BMJ Qual Saf* 2015;24:167-174.
- 3 Ansley D. 5 questions you need to ask your doctor. *Consumer Reports* 2016 <https://www.consumerreports.org/doctors/questions-to-ask-your-doctor/> (accessed 19 Jul 2019).
- 4 Choosing Wisely Australia 2017 Report: Join the Conversation 2017 <http://www.choosingwisely.org.au/getmedia/042fedfe-6bdd-4a76-ae20-682f051eb791/Choosing-Wisely-in-Australia-2017-Report.aspx> (accessed 19 Jul 2019).
- 5 Légaré F, Adekpedjou R, Stacey D, Turcotte S, Kryworuchko J, Graham ID, et al. Interventions for increasing the use of shared decision-making by healthcare professionals *Cochrane Database Syst Rev* 2018;19(7):CD006732.
- 6 Choosing Wisely Australia. Starting a Choosing Wisely conversation 2019 <http://www.choosingwisely.org.au/resources/consumers/conversation-starter-kit> (accessed 19 Jul 2019).
- 7 Joseph-Williams N, Edwards A, Elwyn G. Power imbalance prevents shared decision making. *BMJ* 2014;348:g3178.

- 1  
2  
3  
4 8 Joseph-Williams N, Elwyn G, Edwards A. Knowledge is not power for patients: A  
5  
6 systematic review and thematic synthesis of patient-reported barriers and  
7  
8 facilitators to shared decision making. *Patient Educ Couns* 2013;94(3):291-309.  
9  
10  
11 9 Jessup RL, Buchbinder R. What if I cannot choose wisely? Addressing suboptimal  
12  
13 health literacy in our patients to reduce over-diagnosis and overtreatment. *Intern*  
14  
15  
16  
17 *Med J* 2018;48(9):1154-7.  
18  
19  
20 10 Nutbeam D. Health promotion glossary. *Health Promot* 1986;1(1):113.  
21  
22  
23 11 Mitchell S, Sadikova E, Jack B, Paasche-Orlow M. Health literacy and 30-day  
24  
25 postdischarge hospital utilization. *J Health Commun* 2012;17:325.  
26  
27  
28 12 Schillinger D, Grumbach K, Piette J, Wang F, Osmond D, Daher C, et al.  
29  
30 Association of health literacy with diabetes outcomes. *JAMA* 2002;288(4):475-82.  
31  
32  
33 13 Berkman N, Sheridan S, Donahue K, Halpern D, Crotty K, & Berkman N. Low  
34  
35 health literacy and health outcomes: an updated systematic review. *Ann Intern*  
36  
37  
38  
39 *Med*, 2011;155(2):97–107.  
40  
41  
42 14 Schillinger D, Bindman A, Wang F, Stewart A, Piette J. Functional health literacy  
43  
44 and the quality of physician–patient communication among diabetes patients.  
45  
46  
47  
48 *Patient Educ Couns* 2004;52(3):315-23.  
49  
50  
51 15 Durand MA, Carpenter L, Dolan H, Bravo P, Mann M, Bunn F, et al. Do  
52  
53 interventions designed to support shared decision-making reduce health  
54  
55  
56  
57  
58  
59  
60 inequalities? A systematic review and meta-analysis. *Plos One*. 2014;9(4):e94670.

- 1  
2  
3 16 Muscat DM, Shepherd HL, Morony S, Smith SK, Dhillon HM, Trevena L, et al.  
4  
5  
6 Can adults with low literacy understand shared decision making questions? A  
7  
8 qualitative investigation. *Patient Educ Couns* 2016;99(11):1796-802.  
9  
10  
11 17 Muscat DM, Morony S, Shepherd HL, Smith SK, Dhillon HM, Trevena L, et al.  
12  
13  
14 Development and field testing of a consumer shared decision-making training  
15  
16 program for adults with low literacy. *Patient Educ Couns* 2015;98(10):1180-8.  
17  
18  
19 18 Brunner F, Weiser S, Schmid A, Nordin M. Non-specific low back pain In: Boos N,  
20  
21 Aebi M, eds. *Spinal Disorders: Fundamentals of Diagnosis and Treatment*.  
22  
23 Heidelberg, Berlin: Springer Berlin 2008:585-601.  
24  
25  
26 19 Britt H, Miller GC, Henderson J, Bayram C, Harrison C, Valenti L, et al. General  
27  
28 Practice Activity in Australia 2014-2015. Sydney, Australia: University of Sydney  
29  
30 2015.  
31  
32  
33 20 Henschke N, Maher CG, Refshauge KM, Herbert RD, Cumming RG, Bleasel J, et  
34  
35 al. Prevalence of and screening for serious spinal pathology in patients  
36  
37 presenting to primary care settings with acute low back pain. *Arthritis Rheum*  
38  
39 2009;60(10):3072-80.  
40  
41  
42  
43  
44  
45  
46 21 Buchbinder R, van Tulder M, Öberg B, Costa LM, Woolf A, Schoene M, et al. Low  
47  
48 back pain: a call for action. *The Lancet*. 2018;391(10137):2384-8.  
49  
50  
51  
52 22 Foster NE, Anema JR, Cherkin D, Chou R, Cohen SP, Gross DP, et al. Prevention  
53  
54 and treatment of low back pain: evidence, challenges, and promising directions.  
55  
56  
57  
58  
59  
60  
*The Lancet*. 2018;391(10137):2368-83.

- 1  
2  
3 23 Abu Abed M, Himmel W, Vormfelde S, Koschack J. Video-assisted patient  
4  
5 education to modify behavior: A systematic review. *Patient Educ Couns*  
6  
7 2014;97(1):16-22.  
8  
9  
10  
11 24 Hart TL, Blacker S, Panjwani A, Torbit L, Evans M. Development of multimedia  
12  
13 informational tools for breast cancer patients with low levels of health literacy.  
14  
15 *Patient Educ Couns* 2015;98(3):370-7.  
16  
17  
18  
19 25 Lopez-Olivo MA, Ingleshwar A, Volk RJ, Jibaja-Weiss M, Barbo A, Saag K, et al.  
20  
21 Development and pilot testing of multimedia patient education tools for patients  
22  
23 with knee osteoarthritis, osteoporosis, and rheumatoid arthritis. *Arthritis Care*  
24  
25 *Res.* 2018;70(2):213-20.  
26  
27  
28  
29  
30 26 Rubin DL. Listenability as a tool for advancing health literacy. *J Health Commun*  
31  
32 2012;17(sup3):176-90.  
33  
34  
35  
36 27 Bandura A. Guide for constructing self-efficacy scales. In: Pajares F, Urdan TC,  
37  
38 eds. *Self-Efficacy Beliefs of Adolescents*. Greenwich, Conn: Information Age  
39  
40 Pub., Inc; 2006.  
41  
42  
43  
44 28 Couët N, Labrecque M, Robitaille H, Turcotte S, Légaré F. The impact of  
45  
46 DECISION+2 on patient intention to engage in shared decision making:  
47  
48 secondary analysis of a multicentre clustered randomized trial. *Health Expect*  
49  
50 2015;18(6):2629-37.  
51  
52  
53  
54 29 Fisher A, Bonner C, Biankin A, Juraskova I. Factors influencing intention to  
55  
56 undergo whole genome screening in future healthcare: a single-blind parallel-  
57  
58 group randomised trial. *Prev Med* 2012 55:514–20.  
59  
60

- 1  
2  
3 30 Halawany HS, Towiher OS, Manea JT, Abraham NB, Jacob V, Maflehi N.  
4  
5  
6 Awareness, availability and perception of implementation of patients' rights in  
7  
8 Riyadh, Saudi Arabia. *The Saudi J Dent Res* 2016;7(2):132-7.  
9  
10  
11 31 Australian Commission on Safety and Quality in Healthcare. Australian Charter  
12  
13 of Healthcare Rights 2008 [https://www.safetyandquality.gov.au/national-](https://www.safetyandquality.gov.au/national-priorities/charter-of-healthcare-rights/)  
14  
15 [priorities/charter-of-healthcare-rights/](https://www.safetyandquality.gov.au/national-priorities/charter-of-healthcare-rights/) (accessed 19 Jul 2019).  
16  
17  
18  
19 32 Dormandy E, Michie S, Hooper R, Marteau TM. Informed choice in antenatal  
20  
21 Down syndrome screening: A cluster-randomised trial of combined versus  
22  
23 separate visit testing. *Patient Educ Couns* 2006;61(1):56-64.  
24  
25  
26  
27 33 Graham ID, O'Connor AM. Preparation for Decision Making Scale. University of  
28  
29 Ottawa; 1995 [Updated 2005].  
30  
31  
32  
33 34 Shepherd HL, Barratt A, Jones A, Bateson D, Carey K, Trevena LJ, et al. Can  
34  
35 consumers learn to ask three questions to improve shared decision making? A  
36  
37 feasibility study of the ASK (AskShareKnow) Patient–Clinician Communication  
38  
39 Model® intervention in a primary health-care setting. *Health Expect*  
40  
41 2016;19(5):1160-8.  
42  
43  
44  
45  
46 35 Chew LD, Griffin JM, Partin MR, Noorbaloochi S, Grill JP, Snyder A, et al.  
47  
48 Validation of screening questions for limited health literacy in a large va  
49  
50 outpatient population. *J Gen Intern Med* 2008;23(5):561-6.  
51  
52  
53  
54 36 Weiss BD, Mays MZ, Martz W, Castro KM, DeWalt DA, Pignone MP, et al. Quick  
55  
56 assessment of literacy in primary care: the Newest Vital Sign. *Ann Fam Med*  
57  
58 2005;3(6):514-22.  
59  
60

- 1  
2  
3 37 Sterne J, White IR, Carlin JB, Spratt M, Royston P, Kenward MG, et al. Multiple  
4  
5 imputation for missing data in epidemiological and clinical research; potential  
6  
7 and pitfalls. *BMJ* 2009;339(7713):157.  
8  
9  
10  
11 38 Hsieh H-F, Shannon SE. Three approaches to qualitative content analysis. *Qual*  
12  
13 *Health Res* 2005;15(9):1277-88.  
14  
15  
16 39 Choosing Wisely Australia. Choosing Wisely Australia. An initiative of NPS  
17  
18 Medicine Wise 2016 [www.choosingwisely.org.au](http://www.choosingwisely.org.au) (accessed 19 Jul 2019).  
19  
20  
21  
22 40 Elo S, Kyngäs H. The qualitative content analysis process. *J Adv Nurs*  
23  
24 2008;62(1):107-15.  
25  
26  
27 41 Pope C, Ziebland S, Mays N. Analysing qualitative data. *BMJ* 2000;320(7227):114-  
28  
29 6.  
30  
31  
32  
33 42 Choosing Wisely Australia. The Word on the Street (extended). 2017  
34  
35 [http://www.choosingwisely.org.au/resources/videos/the-word-on-the-street-](http://www.choosingwisely.org.au/resources/videos/the-word-on-the-street-interviews-about-interacti/wisely-australia-the-word-on-the-street-(extended)  
36  
37 [interviews-about-interacti/wisely-australia-the-word-on-the-street-\(extended](http://www.choosingwisely.org.au/resources/videos/the-word-on-the-street-interviews-about-interacti/wisely-australia-the-word-on-the-street-(extended)  
38  
39 (accessed 19 Jul 2019).  
40  
41  
42  
43 43 Hoffmann TC, Légaré F, Simmons MB, McNamara K, McCaffery K, Trevena LJ,  
44  
45 et al. Shared decision making: what do clinicians need to know and why should  
46  
47 they bother? *Med J Aus* 2014;201(1):35-9.  
48  
49  
50  
51 44 Charles C, Gafni A, Whelan T. Shared decision-making in the medical encounter:  
52  
53 what does it mean? (or it takes at least two to tango). *Soc Sci Med* 1997;44(5):681-  
54  
55 92.  
56  
57  
58  
59  
60



- 1  
2  
3  
4 45 Choosing Wisely Australia. Choosing Wisely - 'unofficial' film clip. 2014  
5  
6 <http://www.choosingwisely.org.au/resources/videos/other-choosing-wisely->  
7  
8 [videos/unofficial](http://www.choosingwisely.org.au/resources/videos/other-choosing-wisely-) (accessed 19 Jul 2019).  
9  
10  
11 46 Informed Medical Decision Making Foundation. Shared decision making  
12  
13 animated short. 2011 <https://www.youtube.com/watch?v=XPm5iEDEI8Y>  
14  
15 (accessed 19 Jul 2019).  
16  
17  
18 47 Bupa Health UK. What is shared decision making? 2017  
19  
20 <https://www.youtube.com/watch?v=eAaTnGkbpPc> (accessed 19 Jul 2019).  
21  
22  
23 48 Choosing Wisely Australia. 'Tumbleweed' - Find the right questions to ask your  
24  
25 doctor. 2017 [https://www.youtube.com/watch?v=G\\_1M\\_evOYF8](https://www.youtube.com/watch?v=G_1M_evOYF8) (accessed 19 Jul  
26  
27 2019).  
28  
29  
30 49 Choosing Wisely Australia. Stethoscope - We're listening. 2017  
31  
32 <http://www.choosingwisely.org.au/resources/videos/other-choosing-wisely->  
33  
34 [videos/stethoscope](http://www.choosingwisely.org.au/resources/videos/other-choosing-wisely-) (accessed 19 Jul 2019).  
35  
36  
37  
38  
39  
40  
41  
42  
43  
44  
45  
46  
47  
48  
49  
50  
51  
52  
53  
54  
55  
56  
57  
58  
59  
60

### Author contributions

Authorship decisions adhered to ICMJE recommendations. DM, KM and JKS conceived the original idea for this trial, and this was further developed by EHC, RT, EC, MT, JZ and RL. DM and JKS wrote the first draft of this protocol manuscript, and this was edited by all other authors. EC provided valuable input regarding trial design and analytical considerations, and performed the sample size calculations for the trial. All authors contributed to and approved the final version of the manuscript.

### Funding statement

The study was funded by a National Health and Medical Research Council (NHMRC; [help@nhmrc.gov.au](mailto:help@nhmrc.gov.au)) Program Grant (APP1113532). NPS MedicineWise gave permission for investigators' use of the Question Prompt List leaflet without charge. EC was supported by a Sydney Medical School Summer Research Scholarship and KM is supported by an NHMRC Principle Research Fellowship (1121110). Neither the NHMRC nor Sydney Medical School had any role in the design of this study. They will not have a future role in the conduct or write-up of the study or in the decision to submit the findings for publication. A representative of Choosing Wisely Australia (RL) contributed to the design of this study and will have a future role in the conduct and write-up of the study. NPS MedicineWise will not have a role in the decision to submit the study findings for publication.

## Competing interests

Robyn Lindner is an employee NPS MedicineWise which facilitates Choosing Wisely Australia. The University of Sydney owns IP on the video and DM, MT, KM and RT are contributors to the intellectual property.

For peer review only

1  
2  
3 **List of Figures**  
4

5  
6 Figure 1. Possible mechanism of action for effect of Choosing Wisely Australia® 5 Questions  
7 resource on use of unnecessary tests, medications and procedures  
8  
9

10  
11 Figure 2. Time schedule of enrolment, interventions, and assessments  
12  
13  
14  
15  
16  
17  
18  
19  
20  
21  
22  
23  
24  
25  
26  
27  
28  
29  
30  
31  
32  
33  
34  
35  
36  
37  
38  
39  
40  
41  
42  
43  
44  
45  
46  
47  
48  
49  
50  
51  
52  
53  
54  
55  
56  
57  
58  
59  
60

For peer review only

1  
2  
3  
4  
5  
6  
7  
8  
9  
10  
11  
12  
13  
14  
15  
16  
17  
18  
19  
20  
21  
22  
23  
24  
25  
26  
27  
28  
29  
30  
31  
32  
33  
34  
35  
36  
37  
38  
39  
40  
41  
42  
43  
44  
45  
46  
47  
48  
49  
50  
51  
52  
53  
54  
55  
56  
57  
58  
59  
60

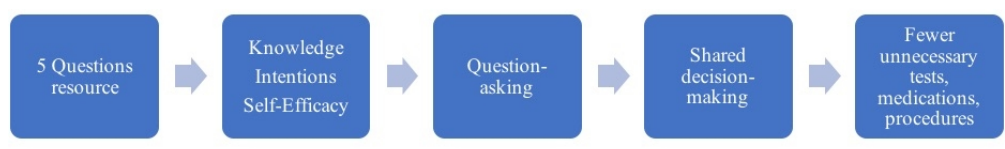

Possible mechanism of action for effect of Choosing Wisely Australia® 5 Questions resource on use of unnecessary tests, medications and procedures

157x26mm (150 x 150 DPI)

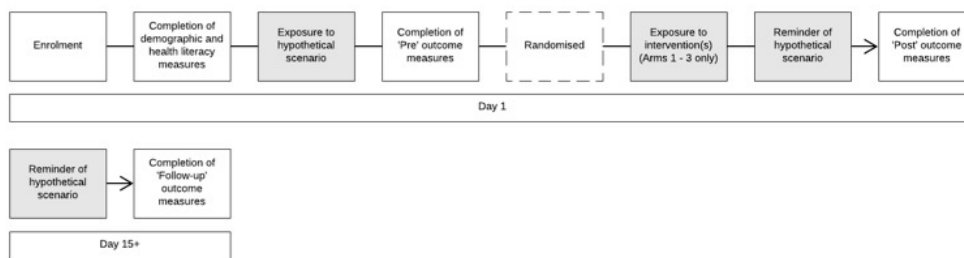

Time schedule of enrolment, interventions, and assessments

270x81mm (72 x 72 DPI)

## Appendix A

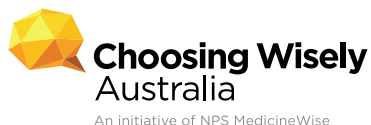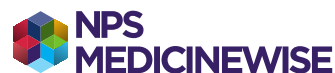

# 5 QUESTIONS

TO ASK YOUR DOCTOR OR OTHER HEALTH CARE PROVIDER BEFORE YOU GET ANY TEST, TREATMENT OR PROCEDURE

Some tests, treatments and procedures provide little benefit. And in some cases, they may even cause harm.

Use the 5 questions to make sure you end up with the right amount of care — not too much and not too little.

1

**DO I REALLY NEED THIS TEST, TREATMENT OR PROCEDURE?** Tests may help you and your doctor or other health care provider determine the problem. Treatments, such as medicines, and procedures may help to treat it.

2

**WHAT ARE THE RISKS?** Will there be side effects to the test or treatment? What are the chances of getting results that aren't accurate? Could that lead to more testing, additional treatments or another procedure?

3

**ARE THERE SIMPLER, SAFER OPTIONS?** Ask if there are alternative options to treatment that could work. Lifestyle changes, such as eating healthier foods or exercising more, can be safe and effective options.

4

**WHAT HAPPENS IF I DON'T DO ANYTHING?** Ask if your condition might get worse — or better — if you don't have the test, treatment or procedure right away.

5

**WHAT ARE THE COSTS?** Costs can be financial, emotional or a cost of your time. Where there is a cost to the community, is the cost reasonable or is there a cheaper alternative?

  
For more information visit  
[choosingwisely.org.au](http://choosingwisely.org.au)  
  
Join the conversation  
[@ChooseWiselyAU](https://twitter.com/ChooseWiselyAU)

Adapted from material developed by Consumer Reports.

Choosing Wisely Australia® is an initiative enabling clinicians, consumers and healthcare stakeholders to start important conversations about unnecessary tests, treatments and procedures. With a focus on high quality care, Choosing Wisely Australia is led by Australia's medical colleges, societies and associations, and facilitated by NPS MedicineWise.

Reasonable care is taken to provide accurate information at the time of creation. This information is not intended as a substitute for medical advice and should not be exclusively relied on to manage or diagnose a medical condition. Choosing Wisely Australia® disclaims all liability (including for negligence) for any loss, damage or injury resulting from reliance on or use of this information. Read the full disclaimer at [choosingwisely.org.au](http://choosingwisely.org.au).

NPS10469

1  
2  
3  
4  
5  
6  
7  
8  
9  
10  
11  
12  
13  
14  
15  
16  
17  
18  
19  
20  
21  
22  
23  
24  
25  
26  
27  
28  
29  
30  
31  
32  
33  
34  
35  
36  
37  
38  
39  
40  
41  
42  
43  
44  
45  
46  
47  
48  
49  
50  
51  
52  
53  
54  
55  
56  
57  
58  
59  
60

For peer review only



## Appendix B

### Helping people to choose wisely: Evaluating methods for shared decision making in populations with different levels of literacy

#### What is the study about?

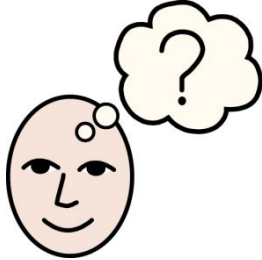

We are doing a research study to try to work out what is the best way of helping people to work with their doctor to decide what to do about their health. It can be hard to think of questions on the spot or you might feel like your questions aren't good enough. This study will look at some tools that help people feel more confident to ask their doctor questions and to explain their point of view and what they think is important.

#### Who is carrying out the study?

We are from the School of Public Health at the University of Sydney. Our names are:

- Danielle Muscat
- Jessica Smith
- Erin Cvejic
- Josh Zadro
- Kirsten McCaffery
- Edward Hoi-Fan Chang
- Marguerite Tracy
- Rachel Thompson

#### What will happen if I say that I want to be in the study?

You can decide if you want to take part in the study or not. Please read this sheet carefully so that you can make up your mind about whether you want to take part. Completing a question in the online survey is an indication of your consent to take part in the study.

You may stop completing the online survey at any point if you do not wish to continue, and we will not use your answers. You do not have to give a reason for not taking part. Once you have submitted your survey anonymously, your responses cannot be withdrawn.

If you decide that you want to be in our study, we will ask you to:

1. Complete questions online. For example, about your age, gender, language spoken at home, and answer some questions about a food label.
2. Watch a video or read some information about asking health questions.
3. Read a made-up scenario and pretend that you are visiting a doctor about a sore back.

4. Complete questions online about patient rights, how you feel about asking the doctor questions, and what you think of the tool provided to you in the study.
5. Write some questions you would want to ask the doctor in the pretend situation.
6. We will send you a follow-up survey one month later which will repeat some of the questions from the first study. This will likely take 5 minutes to complete. We will also provide you with a link to the information or health questions that you received so that you can download them if you would like to.

### Will anyone else know what I say in the study?

All of the information that we have about you from the study will be private. It will be stored in password-protected files on password-protected computers owned by the University of Sydney. We will write a report about the study and show it to other people but no one will know that you were in the study.

### How long will the study take?

The study will take about 20 minutes.

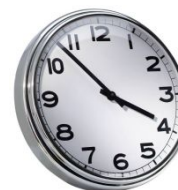

### Are there any good things about being in the study?

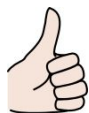

This study may help you think more about the questions you can ask when you visit the doctor. It can be helpful to understand more about your treatment options.

### Are there any bad things about being in the study?

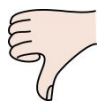

This study will take up some of your time, but we don't think it will be bad for you or cost you anything.

### By giving your consent to take part in this study you are telling us that you:

- ✓ Understand what you have read.
- ✓ Agree to take part in the research study as described above.
- ✓ Agree to the use of your personal information for the research purposes described above.

### What if I want more information about the study or my involvement in it?

You can contact the researcher: Danielle Muscat

- Call: (02) 9351 7819
- Email: [danielle.muscat@sydney.edu.au](mailto:danielle.muscat@sydney.edu.au)

You are also able to email and request a summary of the final findings be sent to you at the end of the study.

### **What if I am not happy with the study or the people doing the study?**

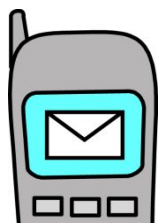

The ethical aspects of this study have been approved by the HREC of the University of Sydney [Project Number 2018/965].

If you are not happy with how we are doing the study or how we treat you, then you can:

- Call the university on +61 2 8627 8176 or
- Write an email to [human.ethics@sydney.edu.au](mailto:human.ethics@sydney.edu.au)

Table A.

*Preparation video text and justification*

| <b>Script text</b>                                                                                                                                                                                                                                                                                              | <b>Speaker</b>          | <b>Development reference(s)</b>                                                                                                                                                                                                                                                                                                                                                                                 |
|-----------------------------------------------------------------------------------------------------------------------------------------------------------------------------------------------------------------------------------------------------------------------------------------------------------------|-------------------------|-----------------------------------------------------------------------------------------------------------------------------------------------------------------------------------------------------------------------------------------------------------------------------------------------------------------------------------------------------------------------------------------------------------------|
| <i>When you visit a doctor, you are in a safe environment with a professional and it's a great time to ask any questions you might have, share information about yourself, discuss your options (or choices) for testing and treatment and make a decision together. This is called shared decision making.</i> | Patient                 | <ul style="list-style-type: none"> <li>- Choosing Wisely Australia video 'The Word on the Street (extended)'.[42]</li> <li>- Shared decision-making definitions in Hoffmann et al (2014) (43) and Charles et al.[44]</li> <li>- Joseph-Williams et al., recommendation that materials should inform patients about shared decision making— what it is, what to expect, and why it is appropriate.[8]</li> </ul> |
| <i>Yes, making decisions with your doctor may seem scary but remember - were experts too! We know what is most important to us, and our values, preferences and experiences.</i>                                                                                                                                | Patient                 | <ul style="list-style-type: none"> <li>- Joseph Williams et al recommendation that materials should explain that there are two experts in the clinical encounter and should also build patients' belief in their ability to take part.[8]</li> </ul>                                                                                                                                                            |
| <i>Shortly, we'll talk about why shared decision making is important and how it can help you make the right decisions about your health.</i>                                                                                                                                                                    | Healthcare professional | <ul style="list-style-type: none"> <li>- Patient Education Materials Assessment tool requirement to clearly and completely state the material's purpose to the listener.</li> <li>- Listenability Style Guide recommendation to provide advanced signposting.</li> </ul>                                                                                                                                        |
| <i>The Australian Charter for Healthcare rights says that everyone has the right to be included in decisions and choices about their care. What that means is that we should be informed about services, treatment options and costs in a clear and open way.</i>                                               | Patient                 | <ul style="list-style-type: none"> <li>- Australian Charter of Healthcare Rights, developed by the Australian Commission on Safety and Quality in Healthcare in 2008.[31]</li> </ul>                                                                                                                                                                                                                            |

---

|                                                                                                                                                                                                                                                                                                                         |                            |                                                                                                                                                                                                                                                                                                      |
|-------------------------------------------------------------------------------------------------------------------------------------------------------------------------------------------------------------------------------------------------------------------------------------------------------------------------|----------------------------|------------------------------------------------------------------------------------------------------------------------------------------------------------------------------------------------------------------------------------------------------------------------------------------------------|
| <p>1<br/>2<br/>3<br/>4<br/>5<br/>6<br/>7 <i>Asking your doctor questions is one way to make</i><br/>8 <i>this happen and can help you to make decisions that</i><br/>9 <i>you are happy with.</i></p>                                                                                                                   | Patient                    | - Choosing Wisely – ‘Unofficial’ film clip.[45]                                                                                                                                                                                                                                                      |
| <p>11<br/>12 <i>There are benefits and harms, or ‘pros’ and ‘cons’,</i><br/>13 <i>to every treatment. Asking questions and sharing</i><br/>14 <i>decisions with your doctor can be helpful to</i><br/>15 <i>understand the options offered to you and their</i><br/>16 <i>benefits and harms.</i></p>                   | Healthcare<br>professional | <ul style="list-style-type: none"> <li>- Choosing Wisely – ‘Unofficial’ film clip.[45]</li> <li>- Informed Medical Decisions Foundation video.[46]</li> <li>- Joseph Williams et al recommendation that materials should challenge attitudes that there are right and wrong decisions.[8]</li> </ul> |
| <p>19<br/>20 <i>For some things these harms may even outweigh</i><br/>21 <i>their benefits. For example, body scans and imaging</i><br/>22 <i>(like doing X-rays or MRIs) for small things may</i><br/>23 <i>actually be more harmful than useful, and</i><br/>24 <i>sometimes it’s better to ‘wait and watch’.</i></p> | Healthcare<br>professional | - Choosing Wisely video ‘The Word on the Street (extended)’.[42]                                                                                                                                                                                                                                     |
| <p>27<br/>28 <i>Sometimes there are no right or wrong choices as</i><br/>29 <i>two treatments may have similar benefits and</i><br/>30 <i>harms. In those instances, sharing your preferences</i><br/>31 <i>and beliefs may help you and the doctor to choose</i><br/>32 <i>the best treatment for you.</i></p>         | Healthcare<br>professional | - Joseph-William’s recommendation to address patient assumptions that there is always a right and wrong decision.                                                                                                                                                                                    |
| <p>35<br/>36 <i>You may be nervous, or even scared, but it is ok to</i><br/>37 <i>ask questions. It’s good to work with your doctor to</i><br/>38 <i>understand your options and in fact research shows</i></p>                                                                                                         | Patient                    | - The use of repetition as a tool for audiovisual materials targeted to people with low health literacy is also referenced in the Listenability Style Guide (LSG).[26]                                                                                                                               |

---

|                                                                                                                                                                                                                                                                                                                                                                                                                           |                                |                                                                                                                                                                                                                                                                                                                                                                                                                                                                                                                                                                                                 |
|---------------------------------------------------------------------------------------------------------------------------------------------------------------------------------------------------------------------------------------------------------------------------------------------------------------------------------------------------------------------------------------------------------------------------|--------------------------------|-------------------------------------------------------------------------------------------------------------------------------------------------------------------------------------------------------------------------------------------------------------------------------------------------------------------------------------------------------------------------------------------------------------------------------------------------------------------------------------------------------------------------------------------------------------------------------------------------|
| <p>1<br/>2<br/>3<br/>4<br/>5<br/>6<br/>7<br/>8<br/>9<br/>10<br/>11<br/>12<br/>13<br/>14<br/>15<br/>16<br/>17<br/>18<br/>19<br/>20<br/>21<br/>22<br/>23<br/>24<br/>25<br/>26<br/>27<br/>28<br/>29<br/>30<br/>31<br/>32<br/>33<br/>34<br/>35<br/>36<br/>37<br/>38<br/>39<br/>40<br/>41<br/>42<br/>43<br/>44<br/>45<br/>46</p> <p><i>that asking questions makes it easier to make decisions that are right for you.</i></p> |                                | <p>- Joseph-Williams’s recommendation that materials should build patients’ belief in their ability to take part.[8]</p>                                                                                                                                                                                                                                                                                                                                                                                                                                                                        |
| <p><i>Just think, if you had to move to a new house or buy a new car, there are a lot of options, with different pros and cons, and your own personal preferences would be very important to consider. So, what about making decisions about your health?</i></p>                                                                                                                                                         | <p>Patient</p>                 | <p>- The questions were also influenced by two Shared Decision Making informational videos.[46,47]</p> <p>- The question asking style and use of analogies is also referenced in the Listenability Style Guide (LSG).[26]</p>                                                                                                                                                                                                                                                                                                                                                                   |
| <p><i>Asking questions and talking to your doctor can also help you to better understand what is happening. You know how sometimes you leave a doctor’s appointment and you don’t really understand what has been said? It’s not a great feeling is it? You should be comfortable with what is being prescribed and why.</i></p>                                                                                          | <p>Patient</p>                 | <p>- Choosing Wisely Australia (39), particularly the “Tumbleweed– Find the right questions to ask your doctor” video.[48]</p> <p>- The use of questions as a tool for audio-visual materials targeted to people with low health literacy is also referenced in the Listenability Style Guide (LSG).[26]</p>                                                                                                                                                                                                                                                                                    |
| <p><i>We want to work with you to make the best decisions and know more about your health. We want you to ask questions.</i></p>                                                                                                                                                                                                                                                                                          | <p>Healthcare professional</p> | <p>- Joseph Williams’ recommendations that materials should redefine perceptions of a good patient and reassure patients that participation will not result in retribution and should also confirm that clinicians want patient participation.[8]</p> <p>- The use of repetition as a tool for audio-visual materials targeted to people with low health literacy is also referenced in the Listenability Style Guide (LSG).[26]</p> <p>- PEMAT-A/V item by providing the viewer with a clear action to take whilst also addressing them directly to maximise the actionability of message.</p> |

1  
2  
3  
4  
5  
6 *We're happy to answer your questions, so together*  
7 *we can work out what is right for you.*

Healthcare  
professional

- Joseph Williams's recommendation that materials should confirm that clinicians want patient participation.[8]
- The use of repetition as a tool for audio-visual materials targeted to people with low health literacy is also referenced in the Listenability Style Guide (LSG).[26]

10  
11  
12  
13  
14 *So remember – ask your questions. We're listening.*  
15 *Let's share decisions together.*

Healthcare  
professional

- Choosing Wisely video resource.[49]

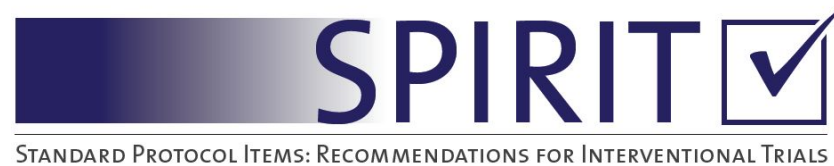

SPIRIT 2013 Checklist: Recommended items to address in a clinical trial protocol and related documents\*

| Section/item                      | Item No | Description                                                                                                                                                                                                                                                                              | Addressed on page number |
|-----------------------------------|---------|------------------------------------------------------------------------------------------------------------------------------------------------------------------------------------------------------------------------------------------------------------------------------------------|--------------------------|
| <b>Administrative information</b> |         |                                                                                                                                                                                                                                                                                          |                          |
| Title                             | 1       | Descriptive title identifying the study design, population, interventions, and, if applicable, trial acronym                                                                                                                                                                             | ___ 1 ___                |
| Trial registration                | 2a      | Trial identifier and registry name. If not yet registered, name of intended registry                                                                                                                                                                                                     | ___ 3 ___                |
|                                   | 2b      | All items from the World Health Organization Trial Registration Data Set                                                                                                                                                                                                                 | _____                    |
| Protocol version                  | 3       | Date and version identifier                                                                                                                                                                                                                                                              | _____                    |
| Funding                           | 4       | Sources and types of financial, material, and other support                                                                                                                                                                                                                              | ___ 28 ___               |
| Roles and responsibilities        | 5a      | Names, affiliations, and roles of protocol contributors                                                                                                                                                                                                                                  | ___ 1,28 ___             |
|                                   | 5b      | Name and contact information for the trial sponsor                                                                                                                                                                                                                                       | ___ 28 ___               |
|                                   | 5c      | Role of study sponsor and funders, if any, in study design; collection, management, analysis, and interpretation of data; writing of the report; and the decision to submit the report for publication, including whether they will have ultimate authority over any of these activities | ___ 28 ___               |
|                                   | 5d      | Composition, roles, and responsibilities of the coordinating centre, steering committee, endpoint adjudication committee, data management team, and other individuals or groups overseeing the trial, if applicable (see Item 21a for data monitoring committee)                         | ___ n/a ___              |



1 **Introduction**

2

3 Background and rationale 6a Description of research question and justification for undertaking the trial, including summary of relevant studies (published and unpublished) examining benefits and harms for each intervention 5-8

4

5

6 6b Explanation for choice of comparators 5-8

7

8 Objectives 7 Specific objectives or hypotheses 8

9

10 Trial design 8 Description of trial design including type of trial (eg, parallel group, crossover, factorial, single group), allocation ratio, and framework (eg, superiority, equivalence, noninferiority, exploratory) 8

11

12

13

14 **Methods: Participants, interventions, and outcomes**

15

16 Study setting 9 Description of study settings (eg, community clinic, academic hospital) and list of countries where data will be collected. Reference to where list of study sites can be obtained 8

17

18

19 Eligibility criteria 10 Inclusion and exclusion criteria for participants. If applicable, eligibility criteria for study centres and individuals who will perform the interventions (eg, surgeons, psychotherapists) 9

20

21

22 Interventions 11a Interventions for each group with sufficient detail to allow replication, including how and when they will be administered 10-11

23

24

25 11b Criteria for discontinuing or modifying allocated interventions for a given trial participant (eg, drug dose change in response to harms, participant request, or improving/worsening disease) n/a

26

27

28 11c Strategies to improve adherence to intervention protocols, and any procedures for monitoring adherence (eg, drug tablet return, laboratory tests) 19

29

30

31 11d Relevant concomitant care and interventions that are permitted or prohibited during the trial 19

32

33

34 Outcomes 12 Primary, secondary, and other outcomes, including the specific measurement variable (eg, systolic blood pressure), analysis metric (eg, change from baseline, final value, time to event), method of aggregation (eg, median, proportion), and time point for each outcome. Explanation of the clinical relevance of chosen efficacy and harm outcomes is strongly recommended 14-17

35

36

37

38

39

40 Participant timeline 13 Time schedule of enrolment, interventions (including any run-ins and washouts), assessments, and visits for participants. A schematic diagram is highly recommended (see Figure) 12

41

42

|   |             |    |                                                                                                                                                                                       |                |
|---|-------------|----|---------------------------------------------------------------------------------------------------------------------------------------------------------------------------------------|----------------|
| 1 | Sample size | 14 | Estimated number of participants needed to achieve study objectives and how it was determined, including clinical and statistical assumptions supporting any sample size calculations | _____ 19 _____ |
| 2 |             |    |                                                                                                                                                                                       |                |
| 3 |             |    |                                                                                                                                                                                       |                |
| 4 | Recruitment | 15 | Strategies for achieving adequate participant enrolment to reach target sample size                                                                                                   | _____ 9 _____  |
| 5 |             |    |                                                                                                                                                                                       |                |

### 6 **Methods: Assignment of interventions (for controlled trials)**

#### 7 Allocation:

|    |                                  |     |                                                                                                                                                                                                                                                                                                                                                          |                  |
|----|----------------------------------|-----|----------------------------------------------------------------------------------------------------------------------------------------------------------------------------------------------------------------------------------------------------------------------------------------------------------------------------------------------------------|------------------|
| 8  |                                  |     |                                                                                                                                                                                                                                                                                                                                                          |                  |
| 9  |                                  |     |                                                                                                                                                                                                                                                                                                                                                          |                  |
| 10 | Sequence generation              | 16a | Method of generating the allocation sequence (eg, computer-generated random numbers), and list of any factors for stratification. To reduce predictability of a random sequence, details of any planned restriction (eg, blocking) should be provided in a separate document that is unavailable to those who enrol participants or assign interventions | _____ 8 _____    |
| 11 |                                  |     |                                                                                                                                                                                                                                                                                                                                                          |                  |
| 12 |                                  |     |                                                                                                                                                                                                                                                                                                                                                          |                  |
| 13 |                                  |     |                                                                                                                                                                                                                                                                                                                                                          |                  |
| 14 |                                  |     |                                                                                                                                                                                                                                                                                                                                                          |                  |
| 15 |                                  |     |                                                                                                                                                                                                                                                                                                                                                          |                  |
| 16 | Allocation concealment mechanism | 16b | Mechanism of implementing the allocation sequence (eg, central telephone; sequentially numbered, opaque, sealed envelopes), describing any steps to conceal the sequence until interventions are assigned                                                                                                                                                | _____ 8 _____    |
| 17 |                                  |     |                                                                                                                                                                                                                                                                                                                                                          |                  |
| 18 |                                  |     |                                                                                                                                                                                                                                                                                                                                                          |                  |
| 19 |                                  |     |                                                                                                                                                                                                                                                                                                                                                          |                  |
| 20 | Implementation                   | 16c | Who will generate the allocation sequence, who will enrol participants, and who will assign participants to interventions                                                                                                                                                                                                                                | _____ 8 _____    |
| 21 |                                  |     |                                                                                                                                                                                                                                                                                                                                                          |                  |
| 22 |                                  |     |                                                                                                                                                                                                                                                                                                                                                          |                  |
| 23 |                                  |     |                                                                                                                                                                                                                                                                                                                                                          |                  |
| 24 | Blinding (masking)               | 17a | Who will be blinded after assignment to interventions (eg, trial participants, care providers, outcome assessors, data analysts), and how                                                                                                                                                                                                                | _____ 8,18 _____ |
| 25 |                                  |     |                                                                                                                                                                                                                                                                                                                                                          |                  |
| 26 |                                  |     |                                                                                                                                                                                                                                                                                                                                                          |                  |
| 27 |                                  | 17b | If blinded, circumstances under which unblinding is permissible, and procedure for revealing a participant's allocated intervention during the trial                                                                                                                                                                                                     | _____ n/a _____  |
| 28 |                                  |     |                                                                                                                                                                                                                                                                                                                                                          |                  |
| 29 |                                  |     |                                                                                                                                                                                                                                                                                                                                                          |                  |
| 30 |                                  |     |                                                                                                                                                                                                                                                                                                                                                          |                  |

### 31 **Methods: Data collection, management, and analysis**

|    |                         |     |                                                                                                                                                                                                                                                                                                                                                                                                              |                   |
|----|-------------------------|-----|--------------------------------------------------------------------------------------------------------------------------------------------------------------------------------------------------------------------------------------------------------------------------------------------------------------------------------------------------------------------------------------------------------------|-------------------|
| 32 |                         |     |                                                                                                                                                                                                                                                                                                                                                                                                              |                   |
| 33 | Data collection methods | 18a | Plans for assessment and collection of outcome, baseline, and other trial data, including any related processes to promote data quality (eg, duplicate measurements, training of assessors) and a description of study instruments (eg, questionnaires, laboratory tests) along with their reliability and validity, if known. Reference to where data collection forms can be found, if not in the protocol | _____ 14-17 _____ |
| 34 |                         |     |                                                                                                                                                                                                                                                                                                                                                                                                              |                   |
| 35 |                         |     |                                                                                                                                                                                                                                                                                                                                                                                                              |                   |
| 36 |                         |     |                                                                                                                                                                                                                                                                                                                                                                                                              |                   |
| 37 |                         |     |                                                                                                                                                                                                                                                                                                                                                                                                              |                   |
| 38 |                         |     |                                                                                                                                                                                                                                                                                                                                                                                                              |                   |
| 39 |                         | 18b | Plans to promote participant retention and complete follow-up, including list of any outcome data to be collected for participants who discontinue or deviate from intervention protocols                                                                                                                                                                                                                    | _____ 19 _____    |
| 40 |                         |     |                                                                                                                                                                                                                                                                                                                                                                                                              |                   |
| 41 |                         |     |                                                                                                                                                                                                                                                                                                                                                                                                              |                   |
| 42 |                         |     |                                                                                                                                                                                                                                                                                                                                                                                                              |                   |

|    |                                 |     |                                                                                                                                                                                                                                                                                                                                       |                 |
|----|---------------------------------|-----|---------------------------------------------------------------------------------------------------------------------------------------------------------------------------------------------------------------------------------------------------------------------------------------------------------------------------------------|-----------------|
| 1  | Data management                 | 19  | Plans for data entry, coding, security, and storage, including any related processes to promote data quality (eg, double data entry; range checks for data values). Reference to where details of data management procedures can be found, if not in the protocol                                                                     | _____18_____    |
| 2  |                                 |     |                                                                                                                                                                                                                                                                                                                                       |                 |
| 3  |                                 |     |                                                                                                                                                                                                                                                                                                                                       |                 |
| 4  |                                 |     |                                                                                                                                                                                                                                                                                                                                       |                 |
| 5  | Statistical methods             | 20a | Statistical methods for analysing primary and secondary outcomes. Reference to where other details of the statistical analysis plan can be found, if not in the protocol                                                                                                                                                              | _____18_____    |
| 6  |                                 |     |                                                                                                                                                                                                                                                                                                                                       |                 |
| 7  |                                 |     |                                                                                                                                                                                                                                                                                                                                       |                 |
| 8  |                                 | 20b | Methods for any additional analyses (eg, subgroup and adjusted analyses)                                                                                                                                                                                                                                                              | _____18,19_____ |
| 9  |                                 |     |                                                                                                                                                                                                                                                                                                                                       |                 |
| 10 |                                 | 20c | Definition of analysis population relating to protocol non-adherence (eg, as randomised analysis), and any statistical methods to handle missing data (eg, multiple imputation)                                                                                                                                                       | _____18,19_____ |
| 11 |                                 |     |                                                                                                                                                                                                                                                                                                                                       |                 |
| 12 |                                 |     |                                                                                                                                                                                                                                                                                                                                       |                 |
| 13 |                                 |     |                                                                                                                                                                                                                                                                                                                                       |                 |
| 14 | <b>Methods: Monitoring</b>      |     |                                                                                                                                                                                                                                                                                                                                       |                 |
| 15 |                                 |     |                                                                                                                                                                                                                                                                                                                                       |                 |
| 16 | Data monitoring                 | 21a | Composition of data monitoring committee (DMC); summary of its role and reporting structure; statement of whether it is independent from the sponsor and competing interests; and reference to where further details about its charter can be found, if not in the protocol. Alternatively, an explanation of why a DMC is not needed | _____n/a_____   |
| 17 |                                 |     |                                                                                                                                                                                                                                                                                                                                       |                 |
| 18 |                                 |     |                                                                                                                                                                                                                                                                                                                                       |                 |
| 19 |                                 |     |                                                                                                                                                                                                                                                                                                                                       |                 |
| 20 |                                 |     |                                                                                                                                                                                                                                                                                                                                       |                 |
| 21 |                                 |     |                                                                                                                                                                                                                                                                                                                                       |                 |
| 22 |                                 | 21b | Description of any interim analyses and stopping guidelines, including who will have access to these interim results and make the final decision to terminate the trial                                                                                                                                                               | _____n/a_____   |
| 23 |                                 |     |                                                                                                                                                                                                                                                                                                                                       |                 |
| 24 |                                 |     |                                                                                                                                                                                                                                                                                                                                       |                 |
| 25 | Harms                           | 22  | Plans for collecting, assessing, reporting, and managing solicited and spontaneously reported adverse events and other unintended effects of trial interventions or trial conduct                                                                                                                                                     | _____n/a_____   |
| 26 |                                 |     |                                                                                                                                                                                                                                                                                                                                       |                 |
| 27 |                                 |     |                                                                                                                                                                                                                                                                                                                                       |                 |
| 28 | Auditing                        | 23  | Frequency and procedures for auditing trial conduct, if any, and whether the process will be independent from investigators and the sponsor                                                                                                                                                                                           | _____n/a_____   |
| 29 |                                 |     |                                                                                                                                                                                                                                                                                                                                       |                 |
| 30 |                                 |     |                                                                                                                                                                                                                                                                                                                                       |                 |
| 31 |                                 |     |                                                                                                                                                                                                                                                                                                                                       |                 |
| 32 | <b>Ethics and dissemination</b> |     |                                                                                                                                                                                                                                                                                                                                       |                 |
| 33 |                                 |     |                                                                                                                                                                                                                                                                                                                                       |                 |
| 34 | Research ethics approval        | 24  | Plans for seeking research ethics committee/institutional review board (REC/IRB) approval                                                                                                                                                                                                                                             | _____20_____    |
| 35 |                                 |     |                                                                                                                                                                                                                                                                                                                                       |                 |
| 36 |                                 |     |                                                                                                                                                                                                                                                                                                                                       |                 |
| 37 | Protocol amendments             | 25  | Plans for communicating important protocol modifications (eg, changes to eligibility criteria, outcomes, analyses) to relevant parties (eg, investigators, REC/IRBs, trial participants, trial registries, journals, regulators)                                                                                                      | _____20-21_____ |
| 38 |                                 |     |                                                                                                                                                                                                                                                                                                                                       |                 |
| 39 |                                 |     |                                                                                                                                                                                                                                                                                                                                       |                 |
| 40 |                                 |     |                                                                                                                                                                                                                                                                                                                                       |                 |
| 41 |                                 |     |                                                                                                                                                                                                                                                                                                                                       |                 |
| 42 |                                 |     |                                                                                                                                                                                                                                                                                                                                       |                 |
| 43 |                                 |     |                                                                                                                                                                                                                                                                                                                                       |                 |
| 44 |                                 |     |                                                                                                                                                                                                                                                                                                                                       |                 |
| 45 |                                 |     |                                                                                                                                                                                                                                                                                                                                       |                 |
| 46 |                                 |     |                                                                                                                                                                                                                                                                                                                                       |                 |

|    |                               |     |                                                                                                                                                                                                                                                                                     |                  |
|----|-------------------------------|-----|-------------------------------------------------------------------------------------------------------------------------------------------------------------------------------------------------------------------------------------------------------------------------------------|------------------|
| 1  | Consent or assent             | 26a | Who will obtain informed consent or assent from potential trial participants or authorised surrogates, and how (see Item 32)                                                                                                                                                        | ___9___          |
| 2  |                               |     |                                                                                                                                                                                                                                                                                     |                  |
| 3  |                               |     |                                                                                                                                                                                                                                                                                     |                  |
| 4  |                               | 26b | Additional consent provisions for collection and use of participant data and biological specimens in ancillary studies, if applicable                                                                                                                                               | ___n/a___        |
| 5  |                               |     |                                                                                                                                                                                                                                                                                     |                  |
| 6  |                               |     |                                                                                                                                                                                                                                                                                     |                  |
| 7  | Confidentiality               | 27  | How personal information about potential and enrolled participants will be collected, shared, and maintained in order to protect confidentiality before, during, and after the trial                                                                                                | 21, Appendix B   |
| 8  |                               |     |                                                                                                                                                                                                                                                                                     |                  |
| 9  |                               |     |                                                                                                                                                                                                                                                                                     |                  |
| 10 | Declaration of interests      | 28  | Financial and other competing interests for principal investigators for the overall trial and each study site                                                                                                                                                                       | ___28___         |
| 11 |                               |     |                                                                                                                                                                                                                                                                                     |                  |
| 12 |                               |     |                                                                                                                                                                                                                                                                                     |                  |
| 13 | Access to data                | 29  | Statement of who will have access to the final trial dataset, and disclosure of contractual agreements that limit such access for investigators                                                                                                                                     | ___28___         |
| 14 |                               |     |                                                                                                                                                                                                                                                                                     |                  |
| 15 |                               |     |                                                                                                                                                                                                                                                                                     |                  |
| 16 | Ancillary and post-trial care | 30  | Provisions, if any, for ancillary and post-trial care, and for compensation to those who suffer harm from trial participation                                                                                                                                                       | ___n/a___        |
| 17 |                               |     |                                                                                                                                                                                                                                                                                     |                  |
| 18 |                               |     |                                                                                                                                                                                                                                                                                     |                  |
| 19 |                               |     |                                                                                                                                                                                                                                                                                     |                  |
| 20 | Dissemination policy          | 31a | Plans for investigators and sponsor to communicate trial results to participants, healthcare professionals, the public, and other relevant groups (eg, via publication, reporting in results databases, or other data sharing arrangements), including any publication restrictions | ___21___         |
| 21 |                               |     |                                                                                                                                                                                                                                                                                     |                  |
| 22 |                               |     |                                                                                                                                                                                                                                                                                     |                  |
| 23 |                               |     |                                                                                                                                                                                                                                                                                     |                  |
| 24 |                               | 31b | Authorship eligibility guidelines and any intended use of professional writers                                                                                                                                                                                                      | ___28___         |
| 25 |                               |     |                                                                                                                                                                                                                                                                                     |                  |
| 26 |                               | 31c | Plans, if any, for granting public access to the full protocol, participant-level dataset, and statistical code                                                                                                                                                                     | ___21___         |
| 27 |                               |     |                                                                                                                                                                                                                                                                                     |                  |
| 28 |                               |     |                                                                                                                                                                                                                                                                                     |                  |
| 29 | <b>Appendices</b>             |     |                                                                                                                                                                                                                                                                                     |                  |
| 30 |                               |     |                                                                                                                                                                                                                                                                                     |                  |
| 31 | Informed consent materials    | 32  | Model consent form and other related documentation given to participants and authorised surrogates                                                                                                                                                                                  | ___Appendix B___ |
| 32 |                               |     |                                                                                                                                                                                                                                                                                     |                  |
| 33 |                               |     |                                                                                                                                                                                                                                                                                     |                  |
| 34 | Biological specimens          | 33  | Plans for collection, laboratory evaluation, and storage of biological specimens for genetic or molecular analysis in the current trial and for future use in ancillary studies, if applicable                                                                                      | ___n/a___        |
| 35 |                               |     |                                                                                                                                                                                                                                                                                     |                  |
| 36 |                               |     |                                                                                                                                                                                                                                                                                     |                  |

\*It is strongly recommended that this checklist be read in conjunction with the SPIRIT 2013 Explanation & Elaboration for important clarification on the items. Amendments to the protocol should be tracked and dated. The SPIRIT checklist is copyrighted by the SPIRIT Group under the Creative Commons "[Attribution-NonCommercial-NoDerivs 3.0 Unported](https://creativecommons.org/licenses/by-nc-nd/3.0/)" license.

# BMJ Open

## Evaluation of the Choosing Wisely Australia® 5 Questions resource and a shared decision-making preparation video: Protocol for an online experiment

|                                 |                                                                                                                                                                                                                                                                                                                                                                                                                                                                                                                                                                                         |
|---------------------------------|-----------------------------------------------------------------------------------------------------------------------------------------------------------------------------------------------------------------------------------------------------------------------------------------------------------------------------------------------------------------------------------------------------------------------------------------------------------------------------------------------------------------------------------------------------------------------------------------|
| Journal:                        | <i>BMJ Open</i>                                                                                                                                                                                                                                                                                                                                                                                                                                                                                                                                                                         |
| Manuscript ID                   | bmjopen-2019-033126.R1                                                                                                                                                                                                                                                                                                                                                                                                                                                                                                                                                                  |
| Article Type:                   | Protocol                                                                                                                                                                                                                                                                                                                                                                                                                                                                                                                                                                                |
| Date Submitted by the Author:   | 08-Oct-2019                                                                                                                                                                                                                                                                                                                                                                                                                                                                                                                                                                             |
| Complete List of Authors:       | Muscat, Danielle; The University of Sydney, Faculty of Medicine and Health<br>Chang, Edward ; The University of Sydney<br>Thompson, Rachel ; The University of Sydney<br>Cvejic, Erin; The University of Sydney<br>Tracy, Marguerite ; The University of Sydney<br>Zadro, Joshua; University of Sydney, Institute for Musculoskeletal Health, School of Public Health<br>Smith, Jessica ; The University of Sydney<br>Lindner, Robyn ; NPS Medicinewise<br>McCaffery, Kirsten; The University of Sydney, Sydney Health Literacy Lab, School of Public Health; The University of Sydney, |
| <b>Primary Subject Heading</b>: | Communication                                                                                                                                                                                                                                                                                                                                                                                                                                                                                                                                                                           |
| Secondary Subject Heading:      | Patient-centred medicine, Public health                                                                                                                                                                                                                                                                                                                                                                                                                                                                                                                                                 |
| Keywords:                       | patient participation, decision making, shared decision making, health literacy, question prompt list, medical overuse                                                                                                                                                                                                                                                                                                                                                                                                                                                                  |
|                                 |                                                                                                                                                                                                                                                                                                                                                                                                                                                                                                                                                                                         |

SCHOLARONE™  
Manuscripts

1  
2  
3 **Evaluation of the Choosing Wisely Australia® 5 Questions resource and a shared**  
4  
5  
6 **decision-making preparation video: Protocol for an online experiment**  
7  
8  
9  
10

11 Danielle Marie Muscat<sup>1,2</sup>, Edward Hoi-fan Chang<sup>1</sup>, Rachel Thompson<sup>1,2</sup>, Erin Cvejic<sup>1</sup>,  
12 Marguerite Tracy<sup>3</sup>, Joshua Zadro<sup>4</sup>, Jessica Kathleen Smith<sup>1</sup>, Robyn Lindner<sup>5</sup>, Kirsten  
13 McCaffery<sup>1,2</sup>  
14  
15

16  
17  
18 <sup>1</sup> University of Sydney, Faculty of Medicine and Health, School of Public Health,  
19 Sydney Health Literacy Lab, New South Wales, Australia  
20  
21

22  
23  
24 <sup>2</sup> University of Sydney, Faculty of Medicine and Health, School of Public Health,  
25 Wisser Healthcare, New South Wales, Australia  
26  
27

28  
29  
30 <sup>3</sup> University of Sydney, Faculty of Medicine and Health, School of Public Health,  
31 New South Wales, Australia  
32  
33

34  
35  
36 <sup>4</sup> University of Sydney, Faculty of Medicine and Health, School of Public Health,  
37 Institute for Musculoskeletal Health, New South Wales, Australia  
38  
39

40  
41  
42 <sup>5</sup> NPS Medicinewise, New South Wales, Australia  
43  
44  
45  
46  
47

48 Corresponding author: 127A Edward Ford Building, University of Sydney, 2006,  
49 NSW, Australia. [danielle.muscat@sydney.edu.au](mailto:danielle.muscat@sydney.edu.au)  
50  
51

52  
53  
54 Keywords: patient participation, decision making, shared decision making, health  
55 literacy, question prompt list, medical overuse  
56  
57  
58  
59  
60

1  
2  
3  
4  
5  
6  
7  
8  
9  
10  
11  
12  
13  
14  
15  
16  
17  
18  
19  
20  
21  
22  
23  
24  
25  
26  
27  
28  
29  
30  
31  
32  
33  
34  
35  
36  
37  
38  
39  
40  
41  
42  
43  
44  
45  
46  
47  
48  
49  
50  
51  
52  
53  
54  
55  
56  
57  
58  
59  
60

For peer review only

## Abstract

**Introduction:** Choosing Wisely, an international effort to reduce low value care worldwide, considers communication between clinicians and patients during routine clinical encounters a key mechanism for change. In Australia, Choosing Wisely has developed a 5 Questions resource to facilitate better conversations. The primary aim of this study is to evaluate the impact of the Choosing Wisely Australia 5 Questions resource and a video designed to prepare patients for question-asking and participation in shared decision-making on a) self-efficacy to ask questions and participate in shared decision-making, b) intention to participate in shared decision-making and c) a range of secondary outcomes. The secondary aim of this study is to determine whether health literacy modifies the effects of the interventions.

**Methods and analysis:** We will use 2x2x2 between-subjects factorial design (preparation video: yes, no x Choosing Wisely 5 questions resource: yes, no x health literacy: adequate, inadequate). Participants will be recruited by an online market research company, presented with a hypothetical non-specific low back pain scenario, and randomised to study groups stratified by health literacy. Quantitative primary and secondary outcome data will be analysed as intention-to-treat using appropriate regression models (i.e., linear regression for continuous outcomes, logistic regression for dichotomous categorical outcomes).



1  
2  
3 **Ethics and dissemination:** Ethical approval for this study was obtained from the  
4  
5  
6 University of Sydney Human Research Ethics Committee (protocol number:  
7  
8  
9 2018/965). The results from this work will be disseminated through peer-reviewed  
10  
11 international journals, conferences and updates with collaborating public health  
12  
13  
14 bodies. Resources developed for this study will be made available to patients and  
15  
16  
17 clinicians following trial completion.  
18  
19  
20

21 **Study registration:** This trial has been registered with the Australia New Zealand  
22  
23  
24 Clinical Trials Registry (trial number: 376477).  
25  
26  
27  
28  
29  
30  
31  
32  
33  
34  
35  
36  
37  
38  
39  
40  
41  
42  
43  
44  
45  
46  
47  
48  
49  
50  
51  
52  
53  
54  
55  
56  
57  
58  
59  
60

### Strengths and limitations of this study

- This is the first study to assess the relative impact of the Choosing Wisely Australia 5 Questions resource, both alone and in combination with an additional video intervention designed to support and build patients' confidence to ask questions compared to no intervention, and explore whether health literacy modifies the impact of interventions.
- We will randomly allocate participants, conceal allocation, blind study statisticians and aim to recruit 1432 participants to achieve at least 80% power.
- The main limitation of this study is reduced ecological validity and the limited generalisability of the findings due to a) online recruitment and use of 'healthy volunteers', b) the use of a hypothetical scenario, and c) delivering the interventions in a way that diverges from how they would be/are delivered in the real world.
- However, this design allows us to achieve a high response and follow-up rate with adequate representation of people with limited health literacy in a factorial design requiring a large sample.
- The measure of health literacy used in this study focuses on functional health literacy, but enables automatic scoring and categorisation of participants in an online setting.

1  
2  
3  
4  
5  
6  
7  
8  
9  
10  
11  
12  
13  
14  
15  
16  
17  
18  
19  
20  
21  
22  
23  
24  
25  
26  
27  
28  
29  
30  
31  
32  
33  
34  
35  
36  
37  
38  
39  
40  
41  
42  
43  
44  
45  
46  
47  
48  
49  
50  
51  
52  
53  
54  
55  
56  
57  
58  
59  
60

## Evaluation of the Choosing Wisely Australia® 5 Questions resource and a shared decision-making preparation video: Protocol for an online experiment

Unnecessary and potentially harmful services account for a significant proportion of total health expenditure.[1] The need to eliminate unnecessary medical care, decrease waste and reduce overdiagnosis has received increasing attention from health systems in the past decade. One initiative that has gained momentum worldwide is Choosing Wisely®.[2] Launched in April 2012 by the American Board of Internal Medicine (ABIM) Foundation, the Choosing Wisely campaign has now been adapted and implemented in more than 20 countries worldwide. The campaign seeks to encourage clinicians and patients to talk about medical tests and procedures that may be unnecessary, and in some instances, can cause harm.[2] While acknowledging that it is often challenging to have conversations about unnecessary tests and treatments, leaders of the campaign consider communication between clinicians and patients during routine clinical encounters a key mechanism for change.[2]

As part of the original Choosing Wisely campaign, Consumer Reports (an independent non-profit product-testing organisation) partnered with the ABIM Foundation and developed five questions for patients to ask healthcare providers to support better conversations about unnecessary tests, medications and procedures.[3] The questions are publically available and have been promoted for

1  
2  
3 use nationally and internationally. The five questions were adopted by Choosing  
4  
5 Wisely Australia® (with some minor phrasing changes; see Box 1) and have been  
6  
7 disseminated in several forms and languages, including as a one-page downloadable  
8  
9 resource, '5 Questions to Ask Your Doctor' (hereafter referred to as the 5 Questions  
10  
11 resource), that lists the questions and provides additional guidance in their rationale  
12  
13 and use (see Appendix A). Annual evaluation surveys conducted by Choosing  
14  
15 Wisely Australia suggested that, in 2015 and 2016, 8% of health care consumers were  
16  
17 aware of the 5 Questions resource and, in 2017, it was the organisation's most  
18  
19 commonly downloaded material (4).  
20  
21  
22  
23  
24  
25  
26  
27  
28  
29  
30

### 31 **Box 1. The Choosing Wisely Australia® 5 questions**

- 34 1. Do I really need this test, treatment or procedure?<sup>a</sup>
- 35 2. What are the risks?
- 36 3. Are there simpler, safer options?
- 37 4. What happens if I don't do anything?
- 38 5. What are the costs?<sup>b</sup>

39 © NPS Medicinewise Ltd. Reproduced with permission. Visit [www.choosingwisely.org.au](http://www.choosingwisely.org.au)

40 <sup>a</sup>Original Consumer Reports question: Do I really need this test or procedure?

41 <sup>b</sup>Original Consumer Reports question: How much does it cost?

42  
43  
44  
45  
46  
47  
48  
49  
50  
51  
52  
53  
54 The 5 Questions resource has been promoted for its "potential to facilitate  
55  
56 better conversations between healthcare providers and consumers".[4] However, it  
57  
58 has yet to be formally evaluated, and the precise expected mechanism of action for  
59  
60

1  
2  
3 its effect on the use of low value care has not been investigated. Notwithstanding,  
4  
5  
6 question prompt lists of this kind are typically regarded as a strategy for facilitating  
7  
8  
9 shared decision-making [5] and thus, improved shared decision-making is an  
10  
11  
12 obvious potential mediator of the hypothesised effect of the 5 Questions resource on  
13  
14  
15 the use of care.  
16  
17  
18

19  
20 Despite its potential, focus testing by Choosing Wisely Australia suggested  
21  
22 that the 5 Questions resource alone may not be sufficient for enabling patient  
23  
24  
25 question-asking as people may continue to feel that they do not have permission to  
26  
27  
28 ask questions.[4] In response to this, Choosing Wisely Australia has developed  
29  
30  
31 accompanying resources (e.g., posters featuring local hospital staff,[4] a video  
32  
33  
34 illustrating how to have conversations with health professionals [6]) that address  
35  
36  
37 some potential barriers to the impact of the 5 Questions resource (e.g., the social  
38  
39  
40 unacceptability of active participation, patient concerns about healthcare providers'  
41  
42  
43 reactions and possible retribution). However, other elements proposed as critical for  
44  
45  
46 preparing patients in advance of exposure to a shared decision-making intervention  
47  
48  
49 (e.g., explaining that there are two experts in the encounter (healthcare provider *and*  
50  
51  
52 patient), challenging attitudes that there are universally right and wrong  
53  
54  
55 decisions)[7, 8] remain unaddressed by these resources. An intervention that  
56  
57  
58 addresses all elements considered critical for patient preparation may enhance the  
59  
60  
61 impact of the 5 Questions resource and may also, on its own, be beneficial.[7, 8]

1  
2  
3 The impact of the 5 Questions resource may also depend on patients' health  
4 literacy;<sup>[9]</sup> that is, "the cognitive and social skills which determine the motivation  
5  
6 and ability of individuals to gain access to, understand and use information in ways  
7  
8 which promote and maintain good health"<sup>[10]</sup>. Adults with lower health literacy  
9  
10 have worse health outcomes (e.g. increased hospital admissions and  
11  
12 readmissions;<sup>[11]</sup> poorer chronic disease outcomes <sup>[12]</sup> and increased mortality  
13  
14 <sup>[13]</sup>), and importantly ask fewer questions when seeing healthcare providers.<sup>[14]</sup>  
15  
16  
17  
18  
19  
20  
21  
22 Previous research shows that interventions that are tailored to an individuals' health  
23  
24 literacy level can support more effective communication and potentially reduce  
25  
26 health inequalities for people with lower health literacy.<sup>[15-17]</sup> However,  
27  
28 intervention developers often fail to tailor the design of their interventions to adults  
29  
30 with lower health literacy and rarely evaluate their impact in this group.  
31  
32  
33  
34  
35  
36  
37

### 38 *Objectives*

39  
40  
41 Our overall objective is to better understand the potential of the Choosing  
42  
43 Wisely Australia 5 Questions resource and a newly-developed shared decision-  
44  
45 making preparation video for facilitating shared decision-making and reducing the  
46  
47 use of unnecessary tests, medications and procedures. As this study represents the  
48  
49 world's first evaluation of both interventions, we intend to deliver them online to a  
50  
51 community sample using hypothetical vignettes. Participants are asked to imagine  
52  
53 being in a specific clinical scenario and proximal cognitive-affective outcomes are  
54  
55 assessed following randomisation to different interventions. We consider  
56  
57  
58  
59  
60

1  
2  
3 demonstrating evidence of impact in cognitive and affective outcomes an important  
4 first step before embarking on evaluation in the health care setting. Our primary aim  
5  
6 is to assess the impact of the interventions on participants' a) self-efficacy to ask  
7  
8 questions and participate in shared decision-making, b) intention to participate in  
9  
10 shared decision-making and c) a range of secondary outcomes. Our secondary aim is  
11  
12 to determine whether health literacy modifies the impact of the interventions.  
13  
14  
15  
16  
17  
18  
19  
20  
21

## 22 **Methods**

23  
24  
25 The study methods have been informed by an unpublished pilot study of the  
26  
27 intervention (n=164), which included a qualitative interview study with a sub-set of  
28  
29 health consumers (n=25) to refine the interventions and outcome measures. Data  
30  
31 collection is planned to start in October 2019 and finish in November 2019.  
32  
33  
34  
35  
36  
37  
38

### 39 *Study design and setting*

40  
41 We will use 2x2x2 between-subjects factorial design (preparation video: yes, no x  
42  
43 Choosing Wisely 5 questions resource: yes, no x health literacy: adequate, inadequate). This  
44  
45 design will enable us to assess the relative impact of different interventions, both alone and in  
46  
47 combination compared to no intervention. This design will also allow us to explore whether  
48  
49 health literacy modifies the impact of these interventions.  
50  
51  
52  
53  
54

55 This study will be conducted online using the Qualtrics survey platform.  
56  
57 Randomisation will be undertaken via an automated function in the survey platform  
58  
59  
60

1  
2  
3 using an equal allocation ratio and stratification by participant health literacy  
4  
5  
6 (adequate, inadequate), yielding four trial arms in each health literacy subgroup: (1)  
7  
8 preparation video alone, (2) 5 Questions resource alone, (3) preparation video and 5  
9  
10 Questions resource, and (4) no intervention. Participants will not be blinded to their  
11  
12 assigned intervention.  
13  
14  
15

### 16 17 18 19 *Participants, recruitment, and consent* 20

21  
22 To be eligible to take part, potential participants must be aged 18 years or older; be an  
23  
24 Australian citizen or permanent resident; and possess sufficient self-assessed English  
25  
26 language skills to complete questionnaires in English.  
27  
28  
29

30  
31 Participants will be identified, pre-screened for eligibility, and invited to  
32  
33 consider participation by Dynata, a market research company with a database of  
34  
35 600,000 people willing to be involved in online research. Dynata uses a points  
36  
37 system whereby points are earned for completion of surveys which can be redeemed  
38  
39 for items such as gift vouchers, donations to charities or cash. If participants agree  
40  
41 and are interested in being part of the study, they will be directed to an online  
42  
43 survey hosted in Qualtrics. The first page of the survey will display the  
44  
45 downloadable Participant Information Statement (see Appendix B). In line with the  
46  
47 Australian National Statement on Ethical Conduct in Human Research, 2007  
48  
49 (updated 2018), we have received ethical approval to regard completion of the  
50  
51  
52  
53  
54  
55  
56  
57  
58  
59  
60



1  
2  
3 questionnaire as an indication of consent. Participants are also required to select  
4  
5  
6 'Yes, I would like to participate' to enter the survey.  
7  
8  
9

10  
11 During the study, all participants will be presented with a hypothetical  
12  
13 healthcare scenario that asks them to imagine being in a situation where they have  
14  
15 non-specific low back pain and stable pain/symptoms (See Box 2). Non-specific low  
16  
17 back pain describes pain between the inferior border of the twelfth rib and lower  
18  
19 gluteal folds that is not caused by a serious or specific underlying pathology.[18]  
20  
21 Back pain was the eighth most frequently managed problem Australian general  
22  
23 practice in 2015 [19] and non-specific low back pain accounts for approximately 90%  
24  
25 of low back pain cases.[20] Routine imaging for non-specific low back pain has been  
26  
27 shown to have more harms than benefits, and furthermore many medical treatments  
28  
29 provide little-to-no benefit over placebo.[21, 22]  
30  
31  
32  
33  
34  
35  
36  
37  
38  
39  
40

#### 41 42 **Box 2. Hypothetical back pain scenario**

43  
44 "You have had lower back pain for about one month; it has not improved or  
45  
46 become worse. You did not have an accident to cause the pain; it just began and  
47  
48 has not gone away.  
49

50  
51 You go to your doctor to get advice on what is causing it and what can help with  
52  
53 the pain.  
54  
55  
56  
57  
58  
59  
60

1  
2  
3 The doctor recommends that you have a scan to help figure out what is causing  
4  
5  
6 the pain, and gives you a prescription for some medicine.”  
7  
8  
9

## 10 11 *Interventions*

### 12 13 14 *Preparation video*<sup>1</sup>

15  
16 We developed a short video (3 minutes) intended to prepare patients for  
17  
18 question-asking and shared decision-making. Our rationale for this choice of  
19  
20 intervention included that multimedia formats can be a successful tool in engaging  
21  
22 and educating patients with low health literacy and encouraging or modifying  
23  
24 patient behaviour [23-25] and that videos featuring real people have been found to  
25  
26 be more effective than those which only provide graphically presented information  
27  
28 with voice overs.[23] The video script (Appendix C) was developed through an  
29  
30 iterative process and was intended to integrate the recommendations for effective  
31  
32 preparation as outlined by Joseph-Williams and colleagues.[8] The transcript was  
33  
34 developed with reference to the Listenability Style Guide which outlines principles  
35  
36 to make spoken discourse more comprehensible and ease the cognitive burden of  
37  
38 listening (e.g. repetition of ideas; simple and common idioms; vivid analogies; use of  
39  
40 questions to focus the listener’s attention).[26] The readability level of the script was  
41  
42 also checked and adjusted until a grade five readability level was achieved.  
43  
44  
45  
46  
47  
48  
49  
50  
51  
52  
53  
54  
55  
56  
57  
58

59  
60 <sup>1</sup> In communications with participants, this intervention was referred to as the ‘Introduction to shared decision making’ video

### *Choosing Wisely Australia 5 Questions resource<sup>2</sup>*

The Choosing Wisely Australia 5 Questions resource is a one-page document co-branded by Choosing Wisely Australia and NPS Medicinewise that lists the Choosing Wisely Australia 5 questions (see Box 1 above) and provides additional guidance in their rationale and use (see Appendix A). This resource has a readability score of 9.4.

### *Implementation of interventions*

The interventions will be displayed to participants within the survey platform. To ensure intervention exposure, a timer has been added to the pages displaying the video (3 minutes) and 5 Questions resource (1 minute), preventing participants from progressing to the next survey page until the specified time has elapsed. In the preparation video and 5 Questions resource arm, the video will be presented before the 5 Questions resource. Participants will not be prevented from exposure to any other care or interventions prior to or during the study.

### *Data Collection*

Study data will be collected via surveys administered immediately before ('Pre'), immediately after ('Post'), and two weeks after ('Follow-up') exposure to the relevant intervention(s) (see Figure 1). All outcomes will be assessed by participant

---

<sup>2</sup> In communications with participants, this intervention was referred to as the Choosing Wisely Questions

1  
2  
3  
4  
5  
6  
7  
8  
9  
10  
11  
12  
13  
14  
15  
16  
17  
18  
19  
20  
21  
22  
23  
24  
25  
26  
27  
28  
29  
30  
31  
32  
33  
34  
35  
36  
37  
38  
39  
40  
41  
42  
43  
44  
45  
46  
47  
48  
49  
50  
51  
52  
53  
54  
55  
56  
57  
58  
59  
60

self-report with the exception of 'Indicator of proactive intervention use' (see Outcomes and Measures).

--- Figure 1 ---

For peer review only

### *Outcomes and Measures*

Primary and secondary outcomes for the study, as well as measurement instruments and analysis metrics, are shown in Table 1. Outcomes and measures were refined following a pilot study (n=164). Unpublished pilot data are available from the authors upon request.

For peer review only

Table 1.  
*Outcomes and measurement*

|         | <b>Outcome</b>                                                               | <b>Measure</b>                                                                                                                                                                                                                                                    | <b>Pre</b> | <b>Post</b> | <b>Follow-up</b> |
|---------|------------------------------------------------------------------------------|-------------------------------------------------------------------------------------------------------------------------------------------------------------------------------------------------------------------------------------------------------------------|------------|-------------|------------------|
| Primary | Self-efficacy to ask questions                                               | Single item adapted from Bandura's self-efficacy theory.[27] Participants are asked to rate their degree of confidence to ask questions of their healthcare provider by recording a number from 0 (Cannot do at all) to 100 (Highly certain can do).              | x          | x           | x                |
|         | Self-efficacy to be involved in healthcare decision-making                   | Single item adapted from Bandura's self-efficacy theory.[27] Participants are asked to rate their degree of confidence to be involved in decisions with their healthcare provider by recording a number from 0 (Cannot do at all) to 100 (Highly certain can do). | x          | x           | x                |
|         | Self-efficacy to ask questions and be involved in healthcare decision-making | Composite measure based on two individual items (see above).                                                                                                                                                                                                      | x          | x           | x                |
|         | Intention to engage in shared decision-making                                | Validated, three-item scale (Cronbach alpha = 0.8; [28]) measuring participants' (i) likelihood of engaging in shared decision-making, from very unlikely (-3) to very likely (+3), (ii) odds of engaging in shared decision-making, from very                    | x          | x           | x                |

|           |                                                                                              |                                                                                                                                                                                                                                                                                                                                                                                                                                                                                                                                             |   |   |   |
|-----------|----------------------------------------------------------------------------------------------|---------------------------------------------------------------------------------------------------------------------------------------------------------------------------------------------------------------------------------------------------------------------------------------------------------------------------------------------------------------------------------------------------------------------------------------------------------------------------------------------------------------------------------------------|---|---|---|
|           |                                                                                              | weak (-3) to very strong (+3) and (iii) agreement with the statement 'I intend to engage in shared decision-making', from total disagreement (-3) to total agreement (+3). Total scores will be rescaled on a scale of 0-6 and the sum of the items divided by three to derive the total score of intention.                                                                                                                                                                                                                                |   |   |   |
| Secondary | Intention to follow the treatment plan recommended by the doctor without further questioning | A single item on a 10-point scale, adapted from previous research,[29] assessing hypothetical intention to follow the treatment plan recommended by the doctor without further questioning: 'Which best describes your intention to follow the treatment plan recommended by the doctor without asking further questions?' (1 = 'Definitely will not' to 10 = 'Definitely will').                                                                                                                                                           | x | x | x |
|           | Knowledge of patients' rights in regards to shared decision-making                           | Four questions adapted from Halaway et al [30] and applied to the Australian Charter of Healthcare Rights (second edition).[31] Participants were asked to indicate "Yes", "No" or "Unsure" to show whether they think the following are patient rights: a) ask questions and be involved in open and honest communication; b) make choices with your healthcare provider; c) include the people that you want in planning and decision-making; d) get clear information about your condition, including the possible benefits and risks of | x | x |   |

1  
2  
3  
4  
5  
6  
7  
8  
9  
10  
11  
12  
13  
14  
15  
16  
17  
18  
19  
20  
21  
22  
23  
24  
25  
26  
27  
28  
29  
30  
31  
32  
33  
34  
35  
36  
37  
38  
39  
40  
41  
42  
43  
44  
45  
46

different tests and treatments. A foil question will be included to detect if participants are arbitrarily selecting 'yes' to all questions. Scores are dichotomised into a) all questions correct, or b) not all questions correct.

Attitude toward shared decision-making

Three-item scale adapted from Dormandy et al.,[32] assessing participants' perceptions of shared decision-making as beneficial/not beneficial, worthwhile/not worthwhile and important/unimportant. Each item has seven response options, forming a scale from 3 to 21. Scores will be recoded such that higher scores indicate more positive attitudes towards shared decision-making. Participants responding with the highest possible score on all three questions will be classified as having positive attitudes.

x

Preparedness for shared decision-making

Modified, 8-item version of the Preparation for Decision Making Scale (PrepDM).[33] The PrepDM scale was developed to assess a participants' perception of how useful a decision support intervention is in preparing them to communicate with their practitioner at a consultation visit and to make a health decision. Items are scored on a likert scale 1-5, from 'Not at all' (1) to 'A great deal' (5), with higher scores indicating higher perceived level

x



|                                                                  |                                                                                                                                                                                                                                                                                                                                                                |   |   |
|------------------------------------------------------------------|----------------------------------------------------------------------------------------------------------------------------------------------------------------------------------------------------------------------------------------------------------------------------------------------------------------------------------------------------------------|---|---|
|                                                                  | of preparation for decision-making. Items will be summed and the total score divided by 8.[33]                                                                                                                                                                                                                                                                 |   |   |
| Acceptability ( <i>Arms 1-3 only</i> )                           | Adapted from Shepherd et al.,[34] participants are asked to rate if they would a) recommend the [intervention] to others and b) use the [intervention] again on a four-point scale from 1 (Definitely not) to 4 (Yes, definitely).[34] Recommendations are dichotomised into would recommend (3 and 4) and would not recommend (1 and 2).                      | x |   |
| Indicator of proactive intervention use ( <i>Arms 1-3 only</i> ) | We will assess the proportion of participants who click on a link to their intervention.                                                                                                                                                                                                                                                                       | x | x |
| Healthcare questions                                             | Participants will be asked to write down 5 questions that they would ask the doctor given the hypothetical healthcare scenario. The content of individual responses will be analysed via content analysis using inductive and deductive approaches (see below). The mean number of questions that map onto the Choosing Wisely 5 Questions will be calculated. | x | x |

### *Demographic and health data collection*

In addition to the primary and secondary outcomes, participants will be asked to report their age, gender, Australian state of residence, language spoken at home, education status, employment status, private health insurance status and confidence in filling out medical forms [35]. Participants will also be asked to indicate who is usually involved in healthcare decision-making related to their health, and about their experience and perceived knowledge of low back pain. Health literacy will be assessed by the Newest Vital Sign (NVS), [36] with participants categorised as inadequate (score 0-3 on NVS) or adequate literacy (score 4-6 on NVS). The NVS has been used in other online studies [37], and is an objective, performance-based measure of health literacy skills. We will also administer a single-item measure of self-reported health literacy for the purposes of describing the sample.

### **Analysis**

#### *Quantitative data analysis*

The study statistician will be blinded to the intervention allocation of participants and their level of health literacy until after completion of analyses; a research assistant who has no other involvement in the trial will remove all group identifiers prior to analysis. Quantitative primary and secondary outcome data will be analysed as intention-to-treat using appropriate regression models (i.e., linear

1  
2  
3 regression for continuous outcomes, logistic regression for dichotomous categorical  
4  
5  
6 outcomes). Dichotomous variables representing the study factors (preparation video:  
7  
8 provided, not provided; Choosing Wisely Australia 5 questions resource: provided,  
9  
10 not provided; health literacy: adequate, inadequate) and their interactions will be  
11  
12 included in models as between-subjects fixed effects, controlling for pre-intervention  
13  
14 values (where available). Outcome data collected during the immediate post- and  
15  
16 follow-up survey will be analysed in separate models. Any significant interactions  
17  
18 will be followed-up by sub-group analyses based on potentially relevant  
19  
20 demographic variables.  
21  
22  
23  
24  
25  
26  
27  
28

### 29 *Missing data*

30  
31 The use of an online survey platform minimises the risk of missing data;  
32  
33 participants are required to provide responses to each question before moving on to  
34  
35 subsequent items. As such, data is only missing in cases where participants  
36  
37 discontinue prior to providing responses for outcome measures. Participants who  
38  
39 discontinue the study before completion of the (immediate) post-intervention survey  
40  
41 will be excluded from all analyses. Multiple imputation will be used [38] to impute  
42  
43 occasional cases of missing data (e.g. some outcome measures incomplete) or for  
44  
45 missing responses for participants who complete the initial (pre- and post-) surveys,  
46  
47 but do not return to complete the 2-week follow-up survey. If multiple imputation of  
48  
49 missing data is utilised, sensitivity analyses will be performed comparing the  
50  
51 outcome from complete-case with imputed analyses.  
52  
53  
54  
55  
56  
57  
58  
59  
60

### *Sample size*

Sample size estimates were derived based on the primary outcome of intention score, with the estimates of effect based on previously published values [28] and refined considering pilot data. For each stratified analysis arm (i.e., inadequate health literacy, adequate health literacy), a sample of n=162 subjects per intervention group is expected to provide approximately 80% power to detect a small main effect (effect size of 0.10 or greater) of the Choosing Wisely Australia questions resource; and over 80% power to detect small main effects (effect sizes 0.20 or larger) of the preparation video intervention, and their interaction, at a p-value of 0.05 in primary analyses. As such, we aim to recruit a total sample size of N=1432 (i.e., 716 with inadequate health literacy and 716 with adequate health literacy; with n = 179 participants randomly allocated to each intervention group [preparation video alone, Choosing Wisely Australia 5 questions resource alone, both Choosing Wisely questions and preparation intervention, and control]). This will allow for a drop-out of approximately 10% of participants who discontinue the study before completing the (immediate) post-intervention survey measures.

### *Qualitative data analysis*

Assessment of healthcare questions deemed by participants as important to ask in their hypothetical scenario will be analysed via content analysis.[39] Coding will first be done deductively based on concepts embodied in the Choosing Wisely

1  
2  
3 Australia 5 Questions resource.[40] Two double-blind coders will review all data  
4  
5  
6 and code any questions that fit broadly into 1 of 5 categories: Do I really need this  
7  
8  
9 test, treatment or procedure? What are the risks? Are there simpler, safer options?  
10  
11  
12 What happens if I don't do anything? What are the costs?[41, 42] Any discrepancies  
13  
14  
15 will be resolved through discussion between coders. Remaining responses will be  
16  
17  
18 coded inductively with categories derived from the data.[41] Inductive codes will be  
19  
20  
21 collected to form coding sheets and categories freely generated and grouped through  
22  
23  
24 the abstraction process.[41] The coding scheme will be revised over an iterative process  
25  
26  
27 of discussion and revision to ensure all themes are captured. Based on our previous  
28  
29  
30 work, data will be presented in the form of frequencies expressed as percentages and  
31  
32  
33 actual numbers of key categories. We will also report category names, definitions  
34  
35  
36 and data examples.

## **Ethics and dissemination**

### ***Ethical approval and trial registration***

41  
42 Ethical approval for this study was obtained from the University of Sydney  
43  
44  
45 Human Research Ethics Committee (protocol number: 2018/965). This trial has been  
46  
47  
48 registered with the Australia New Zealand Clinical Trials Registry (trial number:  
49  
50  
51 376477).

### ***Data storage and management***

52  
53  
54  
55  
56  
57 After enrolment, a unique identifier will be assigned to each study  
58  
59  
60 participant. Any participant identifiers will be removed before the data are archived for

1  
2  
3 storage. Data will be downloaded as spreadsheets and stored on password protected  
4  
5  
6 computers which are encrypted per university policy. Listed investigators will have  
7  
8  
9 access to the final study dataset.

### 10 11 12 13 14 *Dissemination and data sharing*

15  
16  
17 To enhance reporting transparency, this study will be reported in accordance  
18  
19 with the Consolidated Standards of Reporting Trials Statement and Checklist. The  
20  
21 results from this work will be published as a full-length, peer-reviewed manuscript  
22  
23 and presented at national and international meetings. The results from this work  
24  
25 will also be disseminated through collaborating public health bodies. Any protocol  
26  
27 modification will be communicated during dissemination activities. Resources  
28  
29 developed for this study will be made available to patients and clinicians following  
30  
31 trial completion.  
32  
33  
34  
35  
36  
37  
38  
39  
40

### 41 *Patient involvement*

42  
43  
44 A consumer was involved in the study design. The consumer helped select  
45  
46 outcomes and outcome measures, develop and refine the intervention, and will  
47  
48 inform the interpretation of the analysis and dissemination of findings. Our study  
49  
50 protocol was also presented to a Choosing Wisely Australia Board Meeting, with  
51  
52 specific feedback sought from the two Consumer Board Members.  
53  
54  
55  
56  
57  
58  
59  
60

## References

- 1 Berwick DM, Hackbarth AD. Eliminating waste in US health care. *JAMA* 2012;307(14):1513-6.
- 2 Levinson W, Kallewaard M, Bhatia RS, Wolfson D, Shortt S, Kerr EA. Choosing Wisely' a growing international campaign. *BMJ Qual Saf* 2015;24:167-174.
- 3 Ansley D. 5 questions you need to ask your doctor. *Consumer Reports* 2016 <https://www.consumerreports.org/doctors/questions-to-ask-your-doctor/> (accessed 19 Jul 2019).
- 4 Choosing Wisely Australia 2017 Report: Join the Conversation 2017 <http://www.choosingwisely.org.au/getmedia/042fedfe-6bdd-4a76-ae20-682f051eb791/Choosing-Wisely-in-Australia-2017-Report.aspx> (accessed 19 Jul 2019).
- 5 Légaré F, Adekpedjou R, Stacey D, Turcotte S, Kryworuchko J, Graham ID, et al. Interventions for increasing the use of shared decision-making by healthcare professionals *Cochrane Database Syst Rev* 2018;19(7):CD006732.
- 6 Choosing Wisely Australia. Starting a Choosing Wisely conversation 2019 <http://www.choosingwisely.org.au/resources/consumers/conversation-starter-kit> (accessed 19 Jul 2019).
- 7 Joseph-Williams N, Edwards A, Elwyn G. Power imbalance prevents shared decision making. *BMJ* 2014;348:g3178.

- 1  
2  
3  
4 8 Joseph-Williams N, Elwyn G, Edwards A. Knowledge is not power for patients: A  
5  
6 systematic review and thematic synthesis of patient-reported barriers and  
7  
8 facilitators to shared decision making. *Patient Educ Couns* 2013;94(3):291-309.  
9  
10  
11 9 Jessup RL, Buchbinder R. What if I cannot choose wisely? Addressing suboptimal  
12  
13 health literacy in our patients to reduce over-diagnosis and overtreatment. *Intern*  
14  
15  
16 *Med J* 2018;48(9):1154-7.  
17  
18  
19 10 Nutbeam D. Health promotion glossary. *Health Promot* 1986;1(1):113.  
20  
21  
22 11 Mitchell S, Sadikova E, Jack B, Paasche-Orlow M. Health literacy and 30-day  
23  
24 postdischarge hospital utilization. *J Health Commun* 2012;17:325.  
25  
26  
27 12 Schillinger D, Grumbach K, Piette J, Wang F, Osmond D, Daher C, et al.  
28  
29 Association of health literacy with diabetes outcomes. *JAMA* 2002;288(4):475-82.  
30  
31  
32 13 Berkman N, Sheridan S, Donahue K, Halpern D, Crotty K, & Berkman N. Low  
33  
34 health literacy and health outcomes: an updated systematic review. *Ann Intern*  
35  
36  
37 *Med*, 2011;155(2):97–107.  
38  
39  
40 14 Schillinger D, Bindman A, Wang F, Stewart A, Piette J. Functional health literacy  
41  
42 and the quality of physician–patient communication among diabetes patients.  
43  
44  
45 *Patient Educ Couns* 2004;52(3):315-23.  
46  
47  
48 15 Durand MA, Carpenter L, Dolan H, Bravo P, Mann M, Bunn F, et al. Do  
49  
50 interventions designed to support shared decision-making reduce health  
51  
52  
53  
54  
55  
56  
57  
58  
59  
60 inequalities? A systematic review and meta-analysis. *Plos One*. 2014;9(4):e94670.



- 1  
2  
3 16 Muscat DM, Shepherd HL, Morony S, Smith SK, Dhillon HM, Trevena L, et al.  
4  
5  
6 Can adults with low literacy understand shared decision making questions? A  
7  
8 qualitative investigation. *Patient Educ Couns* 2016;99(11):1796-802.  
9  
10  
11 17 Muscat DM, Morony S, Shepherd HL, Smith SK, Dhillon HM, Trevena L, et al.  
12  
13  
14 Development and field testing of a consumer shared decision-making training  
15  
16 program for adults with low literacy. *Patient Educ Couns* 2015;98(10):1180-8.  
17  
18  
19 18 Brunner F, Weiser S, Schmid A, Nordin M. Non-specific low back pain In: Boos N,  
20  
21 Aebi M, eds. *Spinal Disorders: Fundamentals of Diagnosis and Treatment*.  
22  
23 Heidelberg, Berlin: Springer Berlin 2008:585-601.  
24  
25  
26 19 Britt H, Miller GC, Henderson J, Bayram C, Harrison C, Valenti L, et al. *General*  
27  
28 *Practice Activity in Australia 2014-2015*. Sydney, Australia: University of Sydney  
29  
30 2015.  
31  
32  
33 20 Henschke N, Maher CG, Refshauge KM, Herbert RD, Cumming RG, Bleasel J, et  
34  
35  
36 al. Prevalence of and screening for serious spinal pathology in patients  
37  
38 presenting to primary care settings with acute low back pain. *Arthritis Rheum*  
39  
40 2009;60(10):3072-80.  
41  
42  
43  
44  
45  
46 21 Buchbinder R, van Tulder M, Öberg B, Costa LM, Woolf A, Schoene M, et al. Low  
47  
48  
49 back pain: a call for action. *The Lancet*. 2018;391(10137):2384-8.  
50  
51  
52 22 Foster NE, Anema JR, Cherkin D, Chou R, Cohen SP, Gross DP, et al. Prevention  
53  
54 and treatment of low back pain: evidence, challenges, and promising directions.  
55  
56  
57 *The Lancet*. 2018;391(10137):2368-83.  
58  
59  
60

- 1  
2  
3 23 Abu Abed M, Himmel W, Vormfelde S, Koschack J. Video-assisted patient  
4  
5 education to modify behavior: A systematic review. *Patient Educ Couns*  
6  
7 2014;97(1):16-22.  
8  
9  
10  
11 24 Hart TL, Blacker S, Panjwani A, Torbit L, Evans M. Development of multimedia  
12  
13 informational tools for breast cancer patients with low levels of health literacy.  
14  
15 *Patient Educ Couns* 2015;98(3):370-7.  
16  
17  
18  
19 25 Lopez-Olivo MA, Ingleshwar A, Volk RJ, Jibaja-Weiss M, Barbo A, Saag K, et al.  
20  
21 Development and pilot testing of multimedia patient education tools for patients  
22  
23 with knee osteoarthritis, osteoporosis, and rheumatoid arthritis. *Arthritis Care*  
24  
25 *Res.* 2018;70(2):213-20.  
26  
27  
28  
29  
30 26 Rubin DL. Listenability Style Guide. In: Worthington DL, Bodie GD, eds. The  
31  
32 Sourcebook of Listening Research: Methodology and Measures. Hoboken, NJ:  
33  
34 John Wiley & Sons, Inc. 2017:361-371.  
35  
36  
37  
38 27 Bandura A. Guide for constructing self-efficacy scales. In: Pajares F, Urdan TC,  
39  
40 eds. Self-Efficacy Beliefs of Adolescents. Greenwich, Conn: Information Age  
41  
42 Pub., Inc; 2006.  
43  
44  
45  
46 28 Couët N, Labrecque M, Robitaille H, Turcotte S, Légaré F. The impact of  
47  
48 DECISION+2 on patient intention to engage in shared decision making:  
49  
50 secondary analysis of a multicentre clustered randomized trial. *Health Expect*  
51  
52 2015;18(6):2629-37.  
53  
54  
55  
56  
57  
58  
59  
60

- 1  
2  
3  
4 29 Fisher A, Bonner C, Biankin A, Juraskova I. Factors influencing intention to  
5  
6 undergo whole genome screening in future healthcare: a single-blind parallel-  
7  
8 group randomised trial. *Prev Med* 2012 55:514–20.  
9  
10  
11 30 Halawany HS, Towiher OS, Manea JT, Abraham NB, Jacob V, Maflehi N.  
12  
13 Awareness, availability and perception of implementation of patients' rights in  
14  
15 Riyadh, Saudi Arabia. *The Saudi J Dent Res* 2016;7(2):132-7.  
16  
17  
18 31 Australian Commission on Safety and Quality in Healthcare. Australian Charter  
19  
20 of Healthcare Rights (second edition) 2019  
21  
22 [https://www.safetyandquality.gov.au/publications-and-resources/resource-](https://www.safetyandquality.gov.au/publications-and-resources/resource-library/australian-charter-healthcare-rights-second-edition-a4-accessible)  
23  
24 [library/australian-charter-healthcare-rights-second-edition-a4-accessible](https://www.safetyandquality.gov.au/publications-and-resources/resource-library/australian-charter-healthcare-rights-second-edition-a4-accessible)  
25  
26  
27 (accessed 12 Sept 2019).  
28  
29  
30  
31  
32 32 Dormandy E, Michie S, Hooper R, Marteau TM. Informed choice in antenatal  
33  
34 Down syndrome screening: A cluster-randomised trial of combined versus  
35  
36 separate visit testing. *Patient Educ Couns* 2006;61(1):56-64.  
37  
38  
39  
40 33 Graham ID, O'Connor AM. Preparation for Decision Making Scale. University of  
41  
42 Ottawa; 1995 [Updated 2005].  
43  
44  
45  
46 34 Shepherd HL, Barratt A, Jones A, Bateson D, Carey K, Trevena LJ, et al. Can  
47  
48 consumers learn to ask three questions to improve shared decision making? A  
49  
50 feasibility study of the ASK (AskShareKnow) Patient–Clinician Communication  
51  
52 Model® intervention in a primary health-care setting. *Health Expect*  
53  
54  
55 2016;19(5):1160-8.  
56  
57  
58  
59  
60

- 1  
2  
3 35 Chew LD, Griffin JM, Partin MR, Noorbaloochi S, Grill JP, Snyder A, et al.  
4  
5  
6 Validation of screening questions for limited health literacy in a large va  
7  
8  
9 outpatient population. *J Gen Intern Med* 2008;23(5):561-6.  
10  
11 36 Weiss BD, Mays MZ, Martz W, Castro KM, DeWalt DA, Pignone MP, et al. Quick  
12  
13  
14 assessment of literacy in primary care: the Newest Vital Sign. *Ann Fam Med*  
15  
16  
17 2005;3(6):514-22.  
18  
19 37 Ayre J, Bonner C, Cvejic E, McCaffery K. Randomized trial of planning tools to  
20  
21  
22 reduce unhealthy snacking: implications for health literacy. *PLoS One* 2019;14(1)  
23  
24  
25 e0209863.  
26  
27 38 Sterne J, White IR, Carlin JB, Spratt M, Royston P, Kenward MG, et al. Multiple  
28  
29  
30 imputation for missing data in epidemiological and clinical research; potential  
31  
32  
33 and pitfalls. *BMJ* 2009;339(7713):157.  
34  
35 39 Hsieh H-F, Shannon SE. Three approaches to qualitative content analysis. *Qual*  
36  
37  
38 *Health Res* 2005;15(9):1277-88.  
39  
40  
41 40 Choosing Wisely Australia. Choosing Wisely Australia. An initiative of NPS  
42  
43  
44 Medicine Wise 2016 [www.choosingwisely.org.au](http://www.choosingwisely.org.au) (accessed 19 Jul 2019).  
45  
46 41 Elo S, Kyngäs H. The qualitative content analysis process. *J Adv Nurs*  
47  
48  
49 2008;62(1):107-15.  
50  
51 42 Pope C, Ziebland S, Mays N. Analysing qualitative data. *BMJ* 2000;320(7227):114-  
52  
53  
54 6.  
55  
56  
57  
58  
59  
60

### Author contributions

Authorship decisions adhered to ICMJE recommendations. DM, KM and JKS conceived the original idea for this trial, and this was further developed by EHC, RT, EC, MT, JZ and RL. DM and JKS wrote the first draft of this protocol manuscript, and this was edited by all other authors. EC provided valuable input regarding trial design and analytical considerations, and performed the sample size calculations for the trial. All authors contributed to and approved the final version of the manuscript.

### Funding statement

The study was funded by a National Health and Medical Research Council (NHMRC; [help@nhmrc.gov.au](mailto:help@nhmrc.gov.au)) Program Grant (APP1113532). NPS MedicineWise gave permission for investigators' use of the Question Prompt List leaflet without charge. EC was supported by a Sydney Medical School Summer Research Scholarship and KM is supported by an NHMRC Principle Research Fellowship (1121110). Neither the NHMRC nor Sydney Medical School had any role in the design of this study. They will not have a future role in the conduct or write-up of the study or in the decision to submit the findings for publication. A representative of Choosing Wisely Australia (RL) contributed to the design of this study and will have a future role in the conduct and write-up of the study. NPS MedicineWise will not have a role in the decision to submit the study findings for publication.

## Competing interests

Robyn Lindner is an employee NPS MedicineWise which facilitates Choosing Wisely Australia. The University of Sydney owns IP on the video and DM, MT, KM and RT are contributors to the intellectual property.

For peer review only

1  
2  
3 **List of Figures**  
4  
5  
6

7 Figure 1. Time schedule of enrolment, interventions, and assessments  
8  
9  
10  
11  
12  
13  
14  
15  
16  
17  
18  
19  
20  
21  
22  
23  
24  
25  
26  
27  
28  
29  
30  
31  
32  
33  
34  
35  
36  
37  
38  
39  
40  
41  
42  
43  
44  
45  
46  
47  
48  
49  
50  
51  
52  
53  
54  
55  
56  
57  
58  
59  
60

For peer review only

1  
2  
3  
4  
5  
6  
7  
8  
9  
10  
11  
12  
13  
14  
15  
16  
17  
18  
19  
20  
21  
22  
23  
24  
25  
26  
27  
28  
29  
30  
31  
32  
33  
34  
35  
36  
37  
38  
39  
40  
41  
42  
43  
44  
45  
46  
47

FO

U

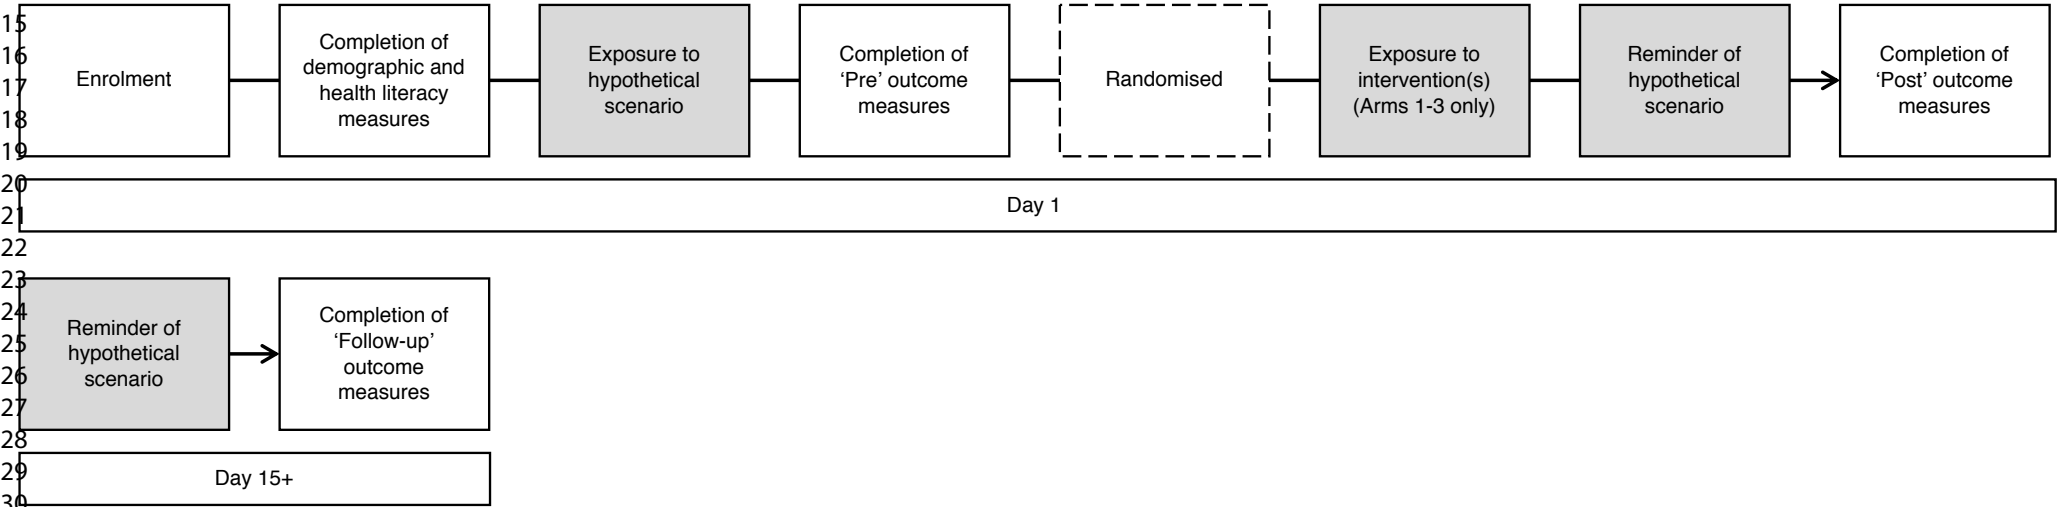



Appendix A

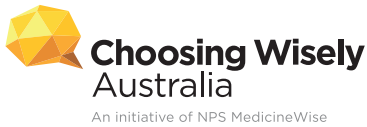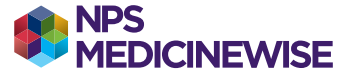

# 5 QUESTIONS

TO ASK YOUR DOCTOR OR OTHER HEALTH CARE PROVIDER BEFORE YOU GET ANY TEST, TREATMENT OR PROCEDURE

Some tests, treatments and procedures provide little benefit. And in some cases, they may even cause harm. Use the 5 questions to make sure you end up with the right amount of care — not too much and not too little.

- 1**

**DO I REALLY NEED THIS TEST, TREATMENT OR PROCEDURE?** Tests may help you and your doctor or other health care provider determine the problem. Treatments, such as medicines, and procedures may help to treat it.
- 2**

**WHAT ARE THE RISKS?** Will there be side effects to the test or treatment? What are the chances of getting results that aren't accurate? Could that lead to more testing, additional treatments or another procedure?
- 3**

**ARE THERE SIMPLER, SAFER OPTIONS?** Ask if there are alternative options to treatment that could work. Lifestyle changes, such as eating healthier foods or exercising more, can be safe and effective options.
- 4**

**WHAT HAPPENS IF I DON'T DO ANYTHING?** Ask if your condition might get worse — or better — if you don't have the test, treatment or procedure right away.
- 5**

**WHAT ARE THE COSTS?** Costs can be financial, emotional or a cost of your time. Where there is a cost to the community, is the cost reasonable or is there a cheaper alternative?

  
 For more information visit  
[choosingwisely.org.au](http://choosingwisely.org.au)  
  
 Join the conversation  
[@ChooseWiselyAU](https://twitter.com/ChooseWiselyAU)

Adapted from material developed by Consumer Reports.

Choosing Wisely Australia® is an initiative enabling clinicians, consumers and healthcare stakeholders to start important conversations about unnecessary tests, treatments and procedures. With a focus on high quality care, Choosing Wisely Australia is led by Australia's medical colleges, societies and associations, and facilitated by NPS MedicineWise.

Reasonable care is taken to provide accurate information at the time of creation. This information is not intended as a substitute for medical advice and should not be exclusively relied on to manage or diagnose a medical condition. Choosing Wisely Australia® disclaims all liability (including for negligence) for any loss, damage or injury resulting from reliance on or use of this information. Read the full disclaimer at [choosingwisely.org.au](http://choosingwisely.org.au).

NPS3646

## Appendix B

### Helping people to choose wisely: Evaluating methods for shared decision making in populations with different levels of literacy

#### What is the study about?

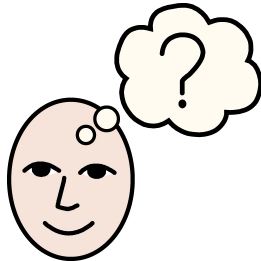

We are doing a research study to try to work out what is the best way of helping people to work with their doctor to decide what to do about their health. It can be hard to think of questions on the spot or you might feel like your questions aren't good enough. This study will look at some tools that help people feel more confident to ask their doctor questions and to explain their point of view and what they think is important.

#### Who is carrying out the study?

We are from the School of Public Health at the University of Sydney. Our names are:

- Danielle Muscat
- Jessica Smith
- Erin Cvejic
- Josh Zadro
- Kirsten McCaffery
- Edward Hoi-Fan Chang
- Marguerite Tracy
- Rachel Thompson

#### What will happen if I say that I want to be in the study?

You can decide if you want to take part in the study or not. Please read this sheet carefully so that you can make up your mind about whether you want to take part. Completing a question in the online survey is an indication of your consent to take part in the study.

You may stop completing the online survey at any point if you do not wish to continue, and we will not use your answers. You do not have to give a reason for not taking part. Once you have submitted your survey anonymously, your responses cannot be withdrawn.

If you decide that you want to be in our study, we will ask you to:

1. Complete questions online. For example, about your age, gender, language spoken at home, and answer some questions about a food label.
2. Watch a video or read some information about asking health questions.
3. Read a made-up scenario and pretend that you are visiting a doctor about a sore back.
4. Complete questions online about patient rights, how you feel about asking the doctor questions, and what you think of the tool provided to you in the study.
5. Write some questions you would want to ask the doctor in the pretend situation.
6. We will send you a follow-up survey one month later which will repeat some of the questions from the first study. This will likely take 5 minutes to complete. We will also provide you with a link to the information or health questions that you received so that you can download them if you would like to.

#### Will anyone else know what I say in the study?

All of the information that we have about you from the study will be private. It will be stored in password-protected files on password-protected computers owned by the University of Sydney. We will write a report about the study and show it to other people but no one will know that you were in the study.

### How long will the study take?

The study will take about 20 minutes.

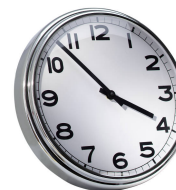

### Are there any good things about being in the study?

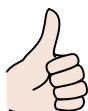

This study may help you think more about the questions you can ask when you visit the doctor. It can be helpful to understand more about your treatment options.

### Are there any bad things about being in the study?

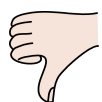

This study will take up some of your time, but we don't think it will be bad for you or cost you anything.

### By giving your consent to take part in this study you are telling us that you:

- ✓ Understand what you have read.
- ✓ Agree to take part in the research study as described above.
- ✓ Agree to the use of your personal information for the research purposes described above.

### What if I want more information about the study or my involvement in it?

You can contact the researcher: Danielle Muscat

- Call: (02) 9351 7819
- Email: [danielle.muscat@sydney.edu.au](mailto:danielle.muscat@sydney.edu.au)

You are also able to email and request a summary of the final findings be sent to you at the end of the study.

### What if I am not happy with the study or the people doing the study?

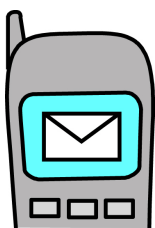

The ethical aspects of this study have been approved by the HREC of the University of Sydney [Project Number 2018/965].

If you are not happy with how we are doing the study or how we treat you, then you can:

- Call the university on +61 2 8627 8176 or
- Write an email to [human.ethics@sydney.edu.au](mailto:human.ethics@sydney.edu.au)

Table A.

*Preparation video text and justification*

| <b>Script text</b>                                                                                                                                                                                                                                                                                              | <b>Speaker</b>          | <b>Development reference(s)</b>                                                                                                                                                                                                                                                                                                                                                                            |
|-----------------------------------------------------------------------------------------------------------------------------------------------------------------------------------------------------------------------------------------------------------------------------------------------------------------|-------------------------|------------------------------------------------------------------------------------------------------------------------------------------------------------------------------------------------------------------------------------------------------------------------------------------------------------------------------------------------------------------------------------------------------------|
| <i>When you visit a doctor, you are in a safe environment with a professional and it's a great time to ask any questions you might have, share information about yourself, discuss your options (or choices) for testing and treatment and make a decision together. This is called shared decision making.</i> | Patient                 | <ul style="list-style-type: none"> <li>- Choosing Wisely Australia video 'The Word on the Street (extended)'.[1]</li> <li>- Shared decision-making definitions in Hoffmann et al (2014)[2] and Charles et al.[3]</li> <li>- Joseph-Williams et al., recommendation that materials should inform patients about shared decision making—what it is, what to expect, and why it is appropriate.[4]</li> </ul> |
| <i>Yes, making decisions with your doctor may seem scary but remember - were experts too! We know what is most important to us, and our values, preferences and experiences.</i>                                                                                                                                | Patient                 | <ul style="list-style-type: none"> <li>- Joseph-Williams et al., recommendation that materials should explain that there are two experts in the clinical encounter and should also build patients' belief in their ability to take part.[4]</li> </ul>                                                                                                                                                     |
| <i>Shortly, we'll talk about why shared decision making is important and how it can help you make the right decisions about your health.</i>                                                                                                                                                                    | Healthcare professional | <ul style="list-style-type: none"> <li>- Patient Education Materials Assessment tool requirement to clearly and completely state the material's purpose to the listener.[5]</li> <li>- Listenability Style Guide recommendation to provide advanced signposting.[6]</li> </ul>                                                                                                                             |
| <i>The Australian Charter for Healthcare rights says that everyone has the right to be included in decisions and choices about their care. What that means is that we should be informed about services, treatment options and costs in a clear and open way.</i>                                               | Patient                 | <ul style="list-style-type: none"> <li>- Australian Charter of Healthcare Rights, developed by the Australian Commission on Safety and Quality in Healthcare.[7]</li> </ul>                                                                                                                                                                                                                                |
| <i>Asking your doctor questions is one way to make this happen and can help you to make decisions that you are happy with.</i>                                                                                                                                                                                  | Patient                 | <ul style="list-style-type: none"> <li>- Choosing Wisely – 'Unofficial' film clip.[8]</li> </ul>                                                                                                                                                                                                                                                                                                           |

|                                                                                                                                                                                                                                                                                                                       |                                |                                                                                                                                                                                                                                                                                                                                      |
|-----------------------------------------------------------------------------------------------------------------------------------------------------------------------------------------------------------------------------------------------------------------------------------------------------------------------|--------------------------------|--------------------------------------------------------------------------------------------------------------------------------------------------------------------------------------------------------------------------------------------------------------------------------------------------------------------------------------|
| <p>1<br/>2<br/>3<br/>4<br/>5<br/>6<br/>7<br/>8<br/>9</p> <p><i>There are benefits and harms, or ‘pros’ and ‘cons’, to every treatment. Asking questions and sharing decisions with your doctor can be helpful to understand the options offered to you and their benefits and harms.</i></p>                          | <p>Healthcare professional</p> | <ul style="list-style-type: none"> <li>- Choosing Wisely – ‘Unofficial’ film clip.[8]</li> <li>- Informed Medical Decisions Foundation shared decision making animated short.[9]</li> <li>- Joseph Williams et al., recommendation that materials should challenge attitudes that there are right and wrong decisions.[4]</li> </ul> |
| <p>10<br/>11<br/>12<br/>13<br/>14<br/>15<br/>16</p> <p><i>For some things these harms may even outweigh their benefits. For example, body scans and imaging (like doing X-rays or MRIs) for small things may actually be more harmful than useful, and sometimes it’s better to ‘wait and watch’.</i></p>             | <p>Healthcare professional</p> | <ul style="list-style-type: none"> <li>- Choosing Wisely video ‘The Word on the Street (extended)’.[1]</li> </ul>                                                                                                                                                                                                                    |
| <p>17<br/>18<br/>19<br/>20<br/>21<br/>22<br/>23</p> <p><i>Sometimes there are no right or wrong choices as two treatments may have similar benefits and harms. In those instances, sharing your preferences and beliefs may help you and the doctor to choose the best treatment for you.</i></p>                     | <p>Healthcare professional</p> | <ul style="list-style-type: none"> <li>- Joseph-Williams et al., recommendation to address patient assumptions that there is always a right and wrong decision.</li> </ul>                                                                                                                                                           |
| <p>24<br/>25<br/>26<br/>27<br/>28<br/>29<br/>30</p> <p><i>You may be nervous, or even scared, but it is ok to ask questions. It’s good to work with your doctor to understand your options and in fact research shows that asking questions makes it easier to make decisions that are right for you.</i></p>         | <p>Patient</p>                 | <ul style="list-style-type: none"> <li>- Listenability Style Guide recommendation to use repetition as a tool for audiovisual materials targeted to people with low health literacy.[6]</li> <li>- Joseph-Williams et al., recommendation that materials should build patients’ belief in their ability to take part.[8]</li> </ul>  |
| <p>31<br/>32<br/>33<br/>34<br/>35<br/>36<br/>37</p> <p><i>Just think, if you had to move to a new house or buy a new car, there are a lot of options, with different pros and cons, and your own personal preferences would be very important to consider. So, what about making decisions about your health?</i></p> | <p>Patient</p>                 | <ul style="list-style-type: none"> <li>- Informed Medical Decisions Foundation shared decision making animated short.[9]</li> <li>- Bupa Health UK – ‘What is shared decision making?’ video [10]</li> <li>- Listenability Style Guide recommendation to incorporate questions and use of analogies.[6]</li> </ul>                   |

1  
2  
3  
4  
5  
6  
7  
8  
9  
10  
11  
12  
13  
14  
15  
16  
17  
18  
19  
20  
21  
22  
23  
24  
25  
26  
27  
28  
29  
30  
31  
32  
33  
34  
35  
36  
37  
38  
39  
40  
41  
42  
43  
44  
45  
46

|                                                                                                                                                                                                                                                                                                                                                                                                                                                                                             |                         |                                                                                                                                                                                                                                                                                                                                                                                                                                                                                                                                                                                                                                       |
|---------------------------------------------------------------------------------------------------------------------------------------------------------------------------------------------------------------------------------------------------------------------------------------------------------------------------------------------------------------------------------------------------------------------------------------------------------------------------------------------|-------------------------|---------------------------------------------------------------------------------------------------------------------------------------------------------------------------------------------------------------------------------------------------------------------------------------------------------------------------------------------------------------------------------------------------------------------------------------------------------------------------------------------------------------------------------------------------------------------------------------------------------------------------------------|
| <p>1<br/>2<br/>3<br/>4<br/>5<br/>6<br/>7<br/>8<br/>9<br/>10<br/>11<br/>12<br/>13<br/>14<br/>15<br/>16<br/>17<br/>18<br/>19<br/>20<br/>21<br/>22<br/>23</p> <p><i>Asking questions and talking to your doctor can also help you to better understand what is happening. You know how sometimes you leave a doctor's appointment and you don't really understand what has been said? It's not a great feeling is it? You should be comfortable with what is being prescribed and why.</i></p> | Patient                 | <ul style="list-style-type: none"> <li>- Choosing Wisely Australia Tumbleweed– Find the right questions to ask your doctor” video.[11]</li> <li>- Listenability Style Guide recommendation to incorporate questions.[6]</li> </ul>                                                                                                                                                                                                                                                                                                                                                                                                    |
| <p>24<br/>25<br/>26<br/>27<br/>28<br/>29<br/>30<br/>31<br/>32<br/>33<br/>34<br/>35<br/>36<br/>37<br/>38<br/>39<br/>40<br/>41<br/>42<br/>43<br/>44<br/>45<br/>46</p> <p><i>We want to work with you to make the best decisions and know more about your health. We want you to ask questions.</i></p>                                                                                                                                                                                        | Healthcare professional | <ul style="list-style-type: none"> <li>- Joseph Williams et al., recommendations that materials should redefine perceptions of a good patient and reassure patients that participation will not result in retribution and should also confirm that clinicians want patient participation.[4]</li> <li>- Listenability Style Guide recommendation to use repetition as a tool for audiovisual materials targeted to people with low health literacy.[6]</li> <li>- PEMAT recommendation to provide the viewer with a clear action to take whilst also addressing them directly to maximise the actionability of message.[5]</li> </ul> |
| <p><i>We're happy to answer your questions, so together we can work out what is right for you.</i></p>                                                                                                                                                                                                                                                                                                                                                                                      | Healthcare professional | <ul style="list-style-type: none"> <li>- Joseph Williams et al., recommendation that materials should confirm that clinicians want patient participation.[4]</li> <li>- Listenability Style Guide recommendation to use repetition as a tool for audiovisual materials targeted to people with low health literacy.[6]</li> </ul>                                                                                                                                                                                                                                                                                                     |
| <p><i>So remember – ask your questions. We're listening. Let's share decisions together.</i></p>                                                                                                                                                                                                                                                                                                                                                                                            | Healthcare professional | <ul style="list-style-type: none"> <li>- Choosing Wisely video resource – Stethoscope - We're listening.[12]</li> </ul>                                                                                                                                                                                                                                                                                                                                                                                                                                                                                                               |

## References

- 1 Choosing Wisely Australia. The Word on the Street (extended). 2017  
[http://www.choosingwisely.org.au/resources/videos/the-word-on-the-street-interviews-  
about-interacti/wisely-australia-the-word-on-the-street-\(extended](http://www.choosingwisely.org.au/resources/videos/the-word-on-the-street-interviews-about-interacti/wisely-australia-the-word-on-the-street-(extended) (accessed 19 Jul 2019).
- 2 Hoffmann TC, Légaré F, Simmons MB, McNamara K, McCaffery K, Trevena LJ, et al.  
Shared decision making: what do clinicians need to know and why should they bother?  
*Med J Aus* 2014;201(1):35-9.
- 3 Charles C, Gafni A, Whelan T. Shared decision-making in the medical encounter: what  
does it mean? (or it takes at least two to tango). *Soc Sci Med* 1997;44(5):681-92.
- 4 Joseph-Williams N, Edwards A, Elwyn G. Power imbalance prevents shared decision  
making. *BMJ* 2014;348:g3178.
- 5 Shoemaker S, Wolf M, Brach C. Development of the Patient Education Materials  
Assessment Tool (PEMAT): A new measure of understandability and actionability for  
print and audiovisual patient information. *Patient Educ Couns* 2014;96(3).  
<https://doi.org/10.1016/j.pec.2014.05.027>
- 6 Rubin DL. Listenability Style Guide. In: Worthington DL, Bodie GD, eds. The Sourcebook  
of Listening Research: Methodology and Measures. Hoboken, NJ: John Wiley & Sons,  
Inc. 2017:361-371.
- 7 Australian Commission on Safety and Quality in Healthcare. Australian Charter of  
Healthcare Rights (second edition) 2019  
[https://www.safetyandquality.gov.au/publications-and-resources/resource-  
library/australian-charter-healthcare-rights-second-edition-a4-accessible](https://www.safetyandquality.gov.au/publications-and-resources/resource-library/australian-charter-healthcare-rights-second-edition-a4-accessible) (accessed 12 Sept  
2019).

- 1  
2  
3 8 Choosing Wisely Australia. Choosing Wisely - 'unofficial' film clip. 2014  
4  
5 <http://www.choosingwisely.org.au/resources/videos/other-choosing-wisely->  
6  
7 [videos/unofficial](http://www.choosingwisely.org.au/resources/videos/other-choosing-wisely-) (accessed 19 Jul 2019).  
8  
9  
10 9 Informed Medical Decision Making Foundation. Shared decision making animated short.  
11  
12 2011 <https://www.youtube.com/watch?v=XPm5iEDEI8Y> (accessed 19 Jul 2019).  
13  
14  
15 10 Bupa Health UK. What is shared decision making? 2017  
16  
17 <https://www.youtube.com/watch?v=eAaTnGkbpPc> (accessed 19 Jul 2019).  
18  
19 11 Choosing Wisely Australia. 'Tumbleweed' - Find the right questions to ask your doctor.  
20  
21 2017 [https://www.youtube.com/watch?v=G\\_1M\\_evOYF8](https://www.youtube.com/watch?v=G_1M_evOYF8) (accessed 19 Jul 2019).  
22  
23  
24 12 Choosing Wisely Australia. Stethoscope - We're listening. 2017  
25  
26 <http://www.choosingwisely.org.au/resources/videos/other-choosing-wisely->  
27  
28 [videos/stethoscope](http://www.choosingwisely.org.au/resources/videos/other-choosing-wisely-) (accessed 19 Jul 2019).  
29  
30  
31  
32  
33  
34  
35  
36  
37  
38  
39  
40  
41  
42  
43  
44  
45  
46  
47  
48  
49  
50  
51  
52  
53  
54  
55  
56  
57  
58  
59  
60





SPIRIT 2013 Checklist: Recommended items to address in a clinical trial protocol and related documents\*

| Section/item                      | Item No | Description                                                                                                                                                                                                                                                                              | Addressed on page number |
|-----------------------------------|---------|------------------------------------------------------------------------------------------------------------------------------------------------------------------------------------------------------------------------------------------------------------------------------------------|--------------------------|
| <b>Administrative information</b> |         |                                                                                                                                                                                                                                                                                          |                          |
| Title                             | 1       | Descriptive title identifying the study design, population, interventions, and, if applicable, trial acronym                                                                                                                                                                             | ___ 1 ___                |
| Trial registration                | 2a      | Trial identifier and registry name. If not yet registered, name of intended registry                                                                                                                                                                                                     | ___ 3 ___                |
|                                   | 2b      | All items from the World Health Organization Trial Registration Data Set                                                                                                                                                                                                                 | _____                    |
| Protocol version                  | 3       | Date and version identifier                                                                                                                                                                                                                                                              | _____                    |
| Funding                           | 4       | Sources and types of financial, material, and other support                                                                                                                                                                                                                              | ___ 28 ___               |
| Roles and responsibilities        | 5a      | Names, affiliations, and roles of protocol contributors                                                                                                                                                                                                                                  | ___ 1,28 ___             |
|                                   | 5b      | Name and contact information for the trial sponsor                                                                                                                                                                                                                                       | ___ 28 ___               |
|                                   | 5c      | Role of study sponsor and funders, if any, in study design; collection, management, analysis, and interpretation of data; writing of the report; and the decision to submit the report for publication, including whether they will have ultimate authority over any of these activities | ___ 28 ___               |
|                                   | 5d      | Composition, roles, and responsibilities of the coordinating centre, steering committee, endpoint adjudication committee, data management team, and other individuals or groups overseeing the trial, if applicable (see Item 21a for data monitoring committee)                         | ___ n/a ___              |

1 **Introduction**

2

3 Background and rationale 6a Description of research question and justification for undertaking the trial, including summary of relevant studies (published and unpublished) examining benefits and harms for each intervention 5-8

4

5

6 6b Explanation for choice of comparators 5-8

7

8 Objectives 7 Specific objectives or hypotheses 8

9

10 Trial design 8 Description of trial design including type of trial (eg, parallel group, crossover, factorial, single group), allocation ratio, and framework (eg, superiority, equivalence, noninferiority, exploratory) 8

11

12

13

14 **Methods: Participants, interventions, and outcomes**

15

16 Study setting 9 Description of study settings (eg, community clinic, academic hospital) and list of countries where data will be collected. Reference to where list of study sites can be obtained 8

17

18

19 Eligibility criteria 10 Inclusion and exclusion criteria for participants. If applicable, eligibility criteria for study centres and individuals who will perform the interventions (eg, surgeons, psychotherapists) 9

20

21

22 Interventions 11a Interventions for each group with sufficient detail to allow replication, including how and when they will be administered 10-11

23

24

25 11b Criteria for discontinuing or modifying allocated interventions for a given trial participant (eg, drug dose change in response to harms, participant request, or improving/worsening disease) n/a

26

27

28 11c Strategies to improve adherence to intervention protocols, and any procedures for monitoring adherence (eg, drug tablet return, laboratory tests) 19

29

30

31 11d Relevant concomitant care and interventions that are permitted or prohibited during the trial 19

32

33

34 Outcomes 12 Primary, secondary, and other outcomes, including the specific measurement variable (eg, systolic blood pressure), analysis metric (eg, change from baseline, final value, time to event), method of aggregation (eg, median, proportion), and time point for each outcome. Explanation of the clinical relevance of chosen efficacy and harm outcomes is strongly recommended 14-17

35

36

37

38

39

40 Participant timeline 13 Time schedule of enrolment, interventions (including any run-ins and washouts), assessments, and visits for participants. A schematic diagram is highly recommended (see Figure) 12

41

42

|   |             |    |                                                                                                                                                                                       |                |
|---|-------------|----|---------------------------------------------------------------------------------------------------------------------------------------------------------------------------------------|----------------|
| 1 | Sample size | 14 | Estimated number of participants needed to achieve study objectives and how it was determined, including clinical and statistical assumptions supporting any sample size calculations | _____ 19 _____ |
| 2 |             |    |                                                                                                                                                                                       |                |
| 3 |             |    |                                                                                                                                                                                       |                |
| 4 | Recruitment | 15 | Strategies for achieving adequate participant enrolment to reach target sample size                                                                                                   | _____ 9 _____  |
| 5 |             |    |                                                                                                                                                                                       |                |

### 6 **Methods: Assignment of interventions (for controlled trials)**

#### 7 Allocation:

|    |                                  |     |                                                                                                                                                                                                                                                                                                                                                          |                  |
|----|----------------------------------|-----|----------------------------------------------------------------------------------------------------------------------------------------------------------------------------------------------------------------------------------------------------------------------------------------------------------------------------------------------------------|------------------|
| 8  |                                  |     |                                                                                                                                                                                                                                                                                                                                                          |                  |
| 9  |                                  |     |                                                                                                                                                                                                                                                                                                                                                          |                  |
| 10 | Sequence generation              | 16a | Method of generating the allocation sequence (eg, computer-generated random numbers), and list of any factors for stratification. To reduce predictability of a random sequence, details of any planned restriction (eg, blocking) should be provided in a separate document that is unavailable to those who enrol participants or assign interventions | _____ 8 _____    |
| 11 |                                  |     |                                                                                                                                                                                                                                                                                                                                                          |                  |
| 12 |                                  |     |                                                                                                                                                                                                                                                                                                                                                          |                  |
| 13 |                                  |     |                                                                                                                                                                                                                                                                                                                                                          |                  |
| 14 |                                  |     |                                                                                                                                                                                                                                                                                                                                                          |                  |
| 15 |                                  |     |                                                                                                                                                                                                                                                                                                                                                          |                  |
| 16 | Allocation concealment mechanism | 16b | Mechanism of implementing the allocation sequence (eg, central telephone; sequentially numbered, opaque, sealed envelopes), describing any steps to conceal the sequence until interventions are assigned                                                                                                                                                | _____ 8 _____    |
| 17 |                                  |     |                                                                                                                                                                                                                                                                                                                                                          |                  |
| 18 |                                  |     |                                                                                                                                                                                                                                                                                                                                                          |                  |
| 19 |                                  |     |                                                                                                                                                                                                                                                                                                                                                          |                  |
| 20 | Implementation                   | 16c | Who will generate the allocation sequence, who will enrol participants, and who will assign participants to interventions                                                                                                                                                                                                                                | _____ 8 _____    |
| 21 |                                  |     |                                                                                                                                                                                                                                                                                                                                                          |                  |
| 22 |                                  |     |                                                                                                                                                                                                                                                                                                                                                          |                  |
| 23 |                                  |     |                                                                                                                                                                                                                                                                                                                                                          |                  |
| 24 | Blinding (masking)               | 17a | Who will be blinded after assignment to interventions (eg, trial participants, care providers, outcome assessors, data analysts), and how                                                                                                                                                                                                                | _____ 8,18 _____ |
| 25 |                                  |     |                                                                                                                                                                                                                                                                                                                                                          |                  |
| 26 |                                  |     |                                                                                                                                                                                                                                                                                                                                                          |                  |
| 27 |                                  | 17b | If blinded, circumstances under which unblinding is permissible, and procedure for revealing a participant's allocated intervention during the trial                                                                                                                                                                                                     | _____ n/a _____  |
| 28 |                                  |     |                                                                                                                                                                                                                                                                                                                                                          |                  |
| 29 |                                  |     |                                                                                                                                                                                                                                                                                                                                                          |                  |
| 30 |                                  |     |                                                                                                                                                                                                                                                                                                                                                          |                  |

### 31 **Methods: Data collection, management, and analysis**

|    |                         |     |                                                                                                                                                                                                                                                                                                                                                                                                              |                   |
|----|-------------------------|-----|--------------------------------------------------------------------------------------------------------------------------------------------------------------------------------------------------------------------------------------------------------------------------------------------------------------------------------------------------------------------------------------------------------------|-------------------|
| 32 |                         |     |                                                                                                                                                                                                                                                                                                                                                                                                              |                   |
| 33 | Data collection methods | 18a | Plans for assessment and collection of outcome, baseline, and other trial data, including any related processes to promote data quality (eg, duplicate measurements, training of assessors) and a description of study instruments (eg, questionnaires, laboratory tests) along with their reliability and validity, if known. Reference to where data collection forms can be found, if not in the protocol | _____ 14-17 _____ |
| 34 |                         |     |                                                                                                                                                                                                                                                                                                                                                                                                              |                   |
| 35 |                         |     |                                                                                                                                                                                                                                                                                                                                                                                                              |                   |
| 36 |                         |     |                                                                                                                                                                                                                                                                                                                                                                                                              |                   |
| 37 |                         |     |                                                                                                                                                                                                                                                                                                                                                                                                              |                   |
| 38 |                         |     |                                                                                                                                                                                                                                                                                                                                                                                                              |                   |
| 39 |                         | 18b | Plans to promote participant retention and complete follow-up, including list of any outcome data to be collected for participants who discontinue or deviate from intervention protocols                                                                                                                                                                                                                    | _____ 19 _____    |
| 40 |                         |     |                                                                                                                                                                                                                                                                                                                                                                                                              |                   |
| 41 |                         |     |                                                                                                                                                                                                                                                                                                                                                                                                              |                   |
| 42 |                         |     |                                                                                                                                                                                                                                                                                                                                                                                                              |                   |

|    |                                 |     |                                                                                                                                                                                                                                                                                                                                       |                 |
|----|---------------------------------|-----|---------------------------------------------------------------------------------------------------------------------------------------------------------------------------------------------------------------------------------------------------------------------------------------------------------------------------------------|-----------------|
| 1  | Data management                 | 19  | Plans for data entry, coding, security, and storage, including any related processes to promote data quality (eg, double data entry; range checks for data values). Reference to where details of data management procedures can be found, if not in the protocol                                                                     | _____18_____    |
| 2  |                                 |     |                                                                                                                                                                                                                                                                                                                                       |                 |
| 3  |                                 |     |                                                                                                                                                                                                                                                                                                                                       |                 |
| 4  |                                 |     |                                                                                                                                                                                                                                                                                                                                       |                 |
| 5  | Statistical methods             | 20a | Statistical methods for analysing primary and secondary outcomes. Reference to where other details of the statistical analysis plan can be found, if not in the protocol                                                                                                                                                              | _____18_____    |
| 6  |                                 |     |                                                                                                                                                                                                                                                                                                                                       |                 |
| 7  |                                 |     |                                                                                                                                                                                                                                                                                                                                       |                 |
| 8  |                                 | 20b | Methods for any additional analyses (eg, subgroup and adjusted analyses)                                                                                                                                                                                                                                                              | _____18,19_____ |
| 9  |                                 |     |                                                                                                                                                                                                                                                                                                                                       |                 |
| 10 |                                 | 20c | Definition of analysis population relating to protocol non-adherence (eg, as randomised analysis), and any statistical methods to handle missing data (eg, multiple imputation)                                                                                                                                                       | _____18,19_____ |
| 11 |                                 |     |                                                                                                                                                                                                                                                                                                                                       |                 |
| 12 |                                 |     |                                                                                                                                                                                                                                                                                                                                       |                 |
| 13 |                                 |     |                                                                                                                                                                                                                                                                                                                                       |                 |
| 14 | <b>Methods: Monitoring</b>      |     |                                                                                                                                                                                                                                                                                                                                       |                 |
| 15 |                                 |     |                                                                                                                                                                                                                                                                                                                                       |                 |
| 16 | Data monitoring                 | 21a | Composition of data monitoring committee (DMC); summary of its role and reporting structure; statement of whether it is independent from the sponsor and competing interests; and reference to where further details about its charter can be found, if not in the protocol. Alternatively, an explanation of why a DMC is not needed | _____n/a_____   |
| 17 |                                 |     |                                                                                                                                                                                                                                                                                                                                       |                 |
| 18 |                                 |     |                                                                                                                                                                                                                                                                                                                                       |                 |
| 19 |                                 |     |                                                                                                                                                                                                                                                                                                                                       |                 |
| 20 |                                 |     |                                                                                                                                                                                                                                                                                                                                       |                 |
| 21 |                                 |     |                                                                                                                                                                                                                                                                                                                                       |                 |
| 22 |                                 | 21b | Description of any interim analyses and stopping guidelines, including who will have access to these interim results and make the final decision to terminate the trial                                                                                                                                                               | _____n/a_____   |
| 23 |                                 |     |                                                                                                                                                                                                                                                                                                                                       |                 |
| 24 |                                 |     |                                                                                                                                                                                                                                                                                                                                       |                 |
| 25 | Harms                           | 22  | Plans for collecting, assessing, reporting, and managing solicited and spontaneously reported adverse events and other unintended effects of trial interventions or trial conduct                                                                                                                                                     | _____n/a_____   |
| 26 |                                 |     |                                                                                                                                                                                                                                                                                                                                       |                 |
| 27 |                                 |     |                                                                                                                                                                                                                                                                                                                                       |                 |
| 28 | Auditing                        | 23  | Frequency and procedures for auditing trial conduct, if any, and whether the process will be independent from investigators and the sponsor                                                                                                                                                                                           | _____n/a_____   |
| 29 |                                 |     |                                                                                                                                                                                                                                                                                                                                       |                 |
| 30 |                                 |     |                                                                                                                                                                                                                                                                                                                                       |                 |
| 31 |                                 |     |                                                                                                                                                                                                                                                                                                                                       |                 |
| 32 | <b>Ethics and dissemination</b> |     |                                                                                                                                                                                                                                                                                                                                       |                 |
| 33 |                                 |     |                                                                                                                                                                                                                                                                                                                                       |                 |
| 34 | Research ethics approval        | 24  | Plans for seeking research ethics committee/institutional review board (REC/IRB) approval                                                                                                                                                                                                                                             | _____20_____    |
| 35 |                                 |     |                                                                                                                                                                                                                                                                                                                                       |                 |
| 36 |                                 |     |                                                                                                                                                                                                                                                                                                                                       |                 |
| 37 | Protocol amendments             | 25  | Plans for communicating important protocol modifications (eg, changes to eligibility criteria, outcomes, analyses) to relevant parties (eg, investigators, REC/IRBs, trial participants, trial registries, journals, regulators)                                                                                                      | _____20-21_____ |
| 38 |                                 |     |                                                                                                                                                                                                                                                                                                                                       |                 |
| 39 |                                 |     |                                                                                                                                                                                                                                                                                                                                       |                 |
| 40 |                                 |     |                                                                                                                                                                                                                                                                                                                                       |                 |
| 41 |                                 |     |                                                                                                                                                                                                                                                                                                                                       |                 |
| 42 |                                 |     |                                                                                                                                                                                                                                                                                                                                       |                 |

|    |                               |     |                                                                                                                                                                                                                                                                                     |                  |
|----|-------------------------------|-----|-------------------------------------------------------------------------------------------------------------------------------------------------------------------------------------------------------------------------------------------------------------------------------------|------------------|
| 1  | Consent or assent             | 26a | Who will obtain informed consent or assent from potential trial participants or authorised surrogates, and how (see Item 32)                                                                                                                                                        | ___9___          |
| 2  |                               |     |                                                                                                                                                                                                                                                                                     |                  |
| 3  |                               |     |                                                                                                                                                                                                                                                                                     |                  |
| 4  |                               | 26b | Additional consent provisions for collection and use of participant data and biological specimens in ancillary studies, if applicable                                                                                                                                               | ___n/a___        |
| 5  |                               |     |                                                                                                                                                                                                                                                                                     |                  |
| 6  |                               |     |                                                                                                                                                                                                                                                                                     |                  |
| 7  | Confidentiality               | 27  | How personal information about potential and enrolled participants will be collected, shared, and maintained in order to protect confidentiality before, during, and after the trial                                                                                                | 21, Appendix B   |
| 8  |                               |     |                                                                                                                                                                                                                                                                                     |                  |
| 9  |                               |     |                                                                                                                                                                                                                                                                                     |                  |
| 10 | Declaration of interests      | 28  | Financial and other competing interests for principal investigators for the overall trial and each study site                                                                                                                                                                       | ___28___         |
| 11 |                               |     |                                                                                                                                                                                                                                                                                     |                  |
| 12 |                               |     |                                                                                                                                                                                                                                                                                     |                  |
| 13 | Access to data                | 29  | Statement of who will have access to the final trial dataset, and disclosure of contractual agreements that limit such access for investigators                                                                                                                                     | ___28___         |
| 14 |                               |     |                                                                                                                                                                                                                                                                                     |                  |
| 15 |                               |     |                                                                                                                                                                                                                                                                                     |                  |
| 16 | Ancillary and post-trial care | 30  | Provisions, if any, for ancillary and post-trial care, and for compensation to those who suffer harm from trial participation                                                                                                                                                       | ___n/a___        |
| 17 |                               |     |                                                                                                                                                                                                                                                                                     |                  |
| 18 |                               |     |                                                                                                                                                                                                                                                                                     |                  |
| 19 |                               |     |                                                                                                                                                                                                                                                                                     |                  |
| 20 | Dissemination policy          | 31a | Plans for investigators and sponsor to communicate trial results to participants, healthcare professionals, the public, and other relevant groups (eg, via publication, reporting in results databases, or other data sharing arrangements), including any publication restrictions | ___21___         |
| 21 |                               |     |                                                                                                                                                                                                                                                                                     |                  |
| 22 |                               |     |                                                                                                                                                                                                                                                                                     |                  |
| 23 |                               |     |                                                                                                                                                                                                                                                                                     |                  |
| 24 |                               | 31b | Authorship eligibility guidelines and any intended use of professional writers                                                                                                                                                                                                      | ___28___         |
| 25 |                               |     |                                                                                                                                                                                                                                                                                     |                  |
| 26 |                               | 31c | Plans, if any, for granting public access to the full protocol, participant-level dataset, and statistical code                                                                                                                                                                     | ___21___         |
| 27 |                               |     |                                                                                                                                                                                                                                                                                     |                  |
| 28 |                               |     |                                                                                                                                                                                                                                                                                     |                  |
| 29 | <b>Appendices</b>             |     |                                                                                                                                                                                                                                                                                     |                  |
| 30 |                               |     |                                                                                                                                                                                                                                                                                     |                  |
| 31 | Informed consent materials    | 32  | Model consent form and other related documentation given to participants and authorised surrogates                                                                                                                                                                                  | ___Appendix B___ |
| 32 |                               |     |                                                                                                                                                                                                                                                                                     |                  |
| 33 |                               |     |                                                                                                                                                                                                                                                                                     |                  |
| 34 | Biological specimens          | 33  | Plans for collection, laboratory evaluation, and storage of biological specimens for genetic or molecular analysis in the current trial and for future use in ancillary studies, if applicable                                                                                      | ___n/a___        |
| 35 |                               |     |                                                                                                                                                                                                                                                                                     |                  |
| 36 |                               |     |                                                                                                                                                                                                                                                                                     |                  |

\*It is strongly recommended that this checklist be read in conjunction with the SPIRIT 2013 Explanation & Elaboration for important clarification on the items. Amendments to the protocol should be tracked and dated. The SPIRIT checklist is copyrighted by the SPIRIT Group under the Creative Commons "[Attribution-NonCommercial-NoDerivs 3.0 Unported](https://creativecommons.org/licenses/by-nc-nd/3.0/)" license.
